**Transcription factors from multiple families ensure enhancer selectivity  
and robust neuron terminal differentiation**

Angela Jimeno-Martín, Erick Sousa, Noemi Daroqui, Rebeca Brocal-Ruiz, Miren

Maicas, Nuria Flames\*

Developmental Neurobiology Unit, Instituto de Biomedicina de Valencia IBV-  
CSIC, Valencia, 46010, Spain

\* Correspondence: [nflames@ibv.csic.es](mailto:nflames@ibv.csic.es)

1 **SUMMARY**

2 To search for general principles underlying neuronal regulatory programs we  
3 built an RNA interference library against all transcription factors (TFs) encoded  
4 in *C. elegans* genome and systematically screened for specification defects in  
5 ten different neuron types of the monoaminergic (MA) superclass.  
6 We identified over 90 TFs involved in MA specification, with at least ten different  
7 TFs controlling differentiation of each individual neuron type. These TFs belong  
8 predominantly to five TF families (HD, bHLH, ZF, bZIP and NHR). Next,  
9 focusing on the complexity of terminal differentiation, we identified and  
10 functionally characterized the dopaminergic terminal regulatory program. We  
11 found that seven TFs from four different families act in a TF collective to provide  
12 genetic robustness and to impose a specific gene regulatory signature enriched  
13 in the regulatory regions of dopamine effector genes. Our results provide new  
14 insights on neuron-type regulatory programs that could help better understand  
15 specification and evolution of neuron types.

16

17

18 **Keywords**

19 neuron specification, *C. elegans*, terminal differentiation, transcription factor  
20 collective, regulatory genome, robustness, gene regulatory network

21

22 The display of a wide range of complex biological functions requires cellular  
23 division of labor that results in multicellular organisms. Cell diversity is  
24 particularly extensive in nervous systems because the complexity of neural  
25 function demands a remarkable degree of cellular specialization. Neuron cell-  
26 types can be classified based on different criteria including morphology,  
27 physiology, neurotransmitter synthesis, molecular markers or whole  
28 transcriptomes (Zeng and Sanes, 2017). Transcription factors (TFs) are the  
29 main orchestrators of neuron-type specification programs and induced  
30 expression of small combinations of TFs is sufficient for direct reprogramming of  
31 non-neuronal cells into specific neuron types (Masserdotti et al., 2016).  
32 However, the complete gene regulatory networks that implement specific  
33 neuron fates, either in development or by induced reprogramming, are still  
34 poorly understood. How many different TFs are involved in the specification of  
35 each neuron type? Are there common rules shared by all neuron-type  
36 specification programs?

37 Previous studies have identified conserved features of neuron specification  
38 programs, such as the importance of morphogens and intercellular signaling for  
39 lineage commitment and neuronal progenitor patterning (Andrews et al., 2019;  
40 Angerer et al., 2011; Borello and Pierani, 2010; Liu and Niswander, 2005; Nuez  
41 and Félix, 2012; Rentzsch et al., 2017), the central role of basic Helix Loop  
42 Helix (bHLH) TFs as proneural factors (Bertrand et al., 2002; Guillemot and  
43 Hassan, 2017), the prevalent role of homeodomain (HD) TFs in neuron subtype  
44 specification (Briscoe et al., 2000; Shirasaki and Pfaff, 2002; Thor et al., 1999)  
45 and the terminal selector model for terminal differentiation, in which TFs directly  
46 regulate expression of most neuron-type specific effector genes (Hobert, 2008).

47 Here we took advantage of the amenability of *Caenorhabditis elegans* for  
48 unbiased large-scale screens to study the complexity of neuronal gene  
49 regulatory networks and to identify common principles underlying the  
50 specification of different types of neurons with shared biological properties. To  
51 this end, we performed an RNA interference (RNAi) screen against all 875  
52 transcription factors (TFs) encoded by the *C. elegans* genome and  
53 systematically assessed their contribution in the specification of ten different  
54 neuronal types of the monoaminergic (MA) superclass. We focused on MA  
55 neurons not only because they are evolutionary conserved and clinically  
56 relevant in humans, but also because the MA superclass comprises a set of  
57 neuronal types with very diverse developmental origins and functions in both  
58 worms and humans (Flames and Hobert, 2011). Importantly, we have  
59 previously shown that gene regulatory networks directing the terminal fate of  
60 two types of MA neurons (dopaminergic and serotonergic neurons) are  
61 conserved in worms and mammals (Doitsidou et al., 2013; Flames and Hobert,  
62 2009; Lloret-Fernández et al., 2018; Remesal et al., 2020). Thus, the  
63 identification of common principles underlying MA specification could help  
64 unravel general rules for neuron-type specification.

65 Our results unveiled four main conclusions. First, specification of each type of  
66 MA neuron is regulated by a complex combination of at least ten different TFs.  
67 These TFs could be acting at any developmental step and are specific for each  
68 neuronal type, despite the shared expression of genes coding for enzymes and  
69 transporters required in monoaminergic metabolism. Second, in spite of this TF  
70 diversity, the TFs involved in the specification of all MA neurons consistently  
71 belong to only five out of the more than fifty *C. elegans* TF families: HD, bHLH,

72 Zinc Finger (ZF), basic Leucine Zipper Domain (bZIP) and non-nematode-  
73 specific members of the Nuclear Hormone Receptors (NHR). Importantly,  
74 analysis of all previously published TF mutant alleles that produce any neuronal  
75 phenotype in *C. elegans* reveals the same TF family distribution, which is  
76 consistent with a general involvement of these TF families in neuron  
77 specification. Third, we specifically focused on neuronal terminal differentiation  
78 programs and found that a complex combination of seven TFs from different  
79 families mediates the establishment of dopaminergic terminal fate. Functionally,  
80 this TF complexity provides robustness to gene expression and enhancer  
81 selectivity. And fourth, the dopaminergic terminal regulatory program plays a  
82 major role in neuron-type specific gene expression and also contributes to a  
83 less extent to panneuronal gene expression in the dopaminergic neurons, but it  
84 is not involved in the regulation of more general routines in the cell or ubiquitous  
85 gene expression. In summary, our results provide new insights into neuronal  
86 gene regulatory networks involved in the generation and evolution of neuron  
87 diversity.  
88

## 89 RESULTS

### 90 A whole genome transcription factor RNAi screen identifies new TFs 91 required for neuron-type specification

92 To increase our understanding of the gene regulatory networks controlling  
93 neuron-type specification we built a complete and fully verified RNAi library  
94 against all the putative TFs encoded in the *C. elegans* genome. This list of  
95 RNAi clones include 763 high confidence TFs plus 112 additional RNAi clones  
96 against medium confidence TFs (Narasimhan et al., 2015; Reece-Hoyes et al.,  
97 2005) (**Data source 1**). 702 clones were extracted from published genome  
98 libraries (Kamath et al., 2003; Rual et al., 2004) and 173 clones were newly  
99 generated. All clones were verified by Sanger sequencing (**Data source 1 and**  
100 **Methods**). This is a new resource for the *C. elegans* community available upon  
101 request.

102 We used the *rrf-3(pk1426)* mutant background to sensitize neurons for RNAi  
103 effects (Simmer et al., 2003) and combined this mutation with three different  
104 fluorescent reporters that label the MA system in the worm: the vesicular  
105 monoamine transporter, *otIs224(cat-1::gfp)* expressed in all MA neurons; the  
106 dopamine transporter, *otIs181(dat-1::mcherry)*, expressed in dopaminergic  
107 neurons only; and the tryptophan hydroxylase enzyme *vsIs97 tph-1::dsred*,  
108 expressed in serotonergic neurons only. Altogether our strategy labels nine  
109 different MA neuronal classes (ADE, CEPV, CEPD, NSM, ADF, RIC, RIM, HSN,  
110 PDE) and the cholinergic VC4 and VC5 motoneurons, which are not MA but  
111 express *cat-1* for unknown reasons (**Figure 1A**). The MA system in *C. elegans*  
112 is developmentally, molecularly and functionally very diverse: (1) in embryonic  
113 development, it arises from very different branches of the AB lineage (**Figure**

114 **1B**), (2) it is composed by motoneurons, sensory neurons, and interneurons,  
115 that altogether use five different neurotransmitters (**Figure 1A**) and (3) each  
116 neuronal type expresses very different transcriptomes, having in common only  
117 the minimal fraction of genes related to MA metabolism (**Figure 1C**). Of note,  
118 the dopaminergic system, composed by four anatomically defined neuronal  
119 types (CEPV, CEPD, ADE and PDE), constitutes an exception to the MA-  
120 system diversity. Although dopaminergic neurons are developmentally diverse,  
121 they are functionally and molecularly homogeneous and share their terminal  
122 differentiation program (Doitsidou et al., 2013; Flames and Hobert, 2009)  
123 (**Figure 1C**). In summary, considering the neuronal diversity of the MA system,  
124 we reasoned their global study would unravel shared principles of *C. elegans*  
125 neuronal specification.

126 Based on reporter expression in worms fed with negative control RNAi we set a  
127 threshold of 10% penetrance for positive hits. Under these conditions, 91 of the  
128 875 clones produced defects in the specification of the MA system. These 91  
129 TF candidates could be acting at any time along development. Missing or  
130 reduced reporter expression was the most frequent phenotype (78 RNAi clones,  
131 **Table 1**) although we also observed ectopic fluorescent cells and migration or  
132 morphology defects (**Figure 1D and Data source 1**). Some clones produce  
133 more than one type of phenotypes depending on the neuron type.

134 From our list of 91 factors we retrieved phenotypes for 22 out of 30 known  
135 regulators of MA neuron fate, including TFs involved in early lineage  
136 specification, neuron migration and known MA terminal selectors (**Data source**  
137 **1**). Thus we estimated a false negative rate of around 27% which is similar to  
138 previous RNAi screens (Simmer et al., 2003). We analyzed randomly selected

139 mutant alleles for 12 candidates determined by RNAi that display various  
140 degrees of penetrance (from more than 80% of animals with defects to less  
141 than 15%, **Table 1**). Eight of the 12 alleles reproduce reporter defects induced  
142 by RNAi (**Table 1**), which revealed a false discovery rate (FDR) of  
143 approximately 33%, similar to published RNAi screens on neuronal functions  
144 (Liachko et al., 2019; Sieburth et al., 2005). Most known regulators of MA fate  
145 showed RNAi penetrances of at least 20% (**Table 1**). Conversely, most false  
146 positives displayed low penetrance RNAi phenotypes (<20%). In total we found  
147 40 "high confidence" TFs displaying at least 20% penetrance by RNAi. 18 out of  
148 the 40 "high confidence" TFs have reported roles in MA specification described  
149 by mutant analysis (**Table 1**). Our mutant allele analysis identified new factors  
150 involved in MA specification, for example, a role for *zip-5/bZIP* TF in RIC and  
151 RIM specification (**Figure 1E**), which is the first reported TF involved in *C.*  
152 *elegans* tyraminerpic and octopaminergic differentiation. We also unravel a role  
153 for *hlh-14/bHLH* TF and *lag-1/CSL* in ADF specification (**Figure 1E**) [also (Poole  
154 et al., 2011) and M.M., A.J., N.F. manuscript in preparation] or *unc-62/MEIS* HD  
155 in dopaminergic specification (**Figure 1E**).

156 We observed that each neuron type is affected by 10 to 15 different TF RNAi  
157 clones (**Table 1** and **Figure 1D**) with the exception of the NSM neurons, for  
158 which only two clones produced missing fluorescence phenotypes. We noticed  
159 that NSM neurons showed weak phenotypes upon *gfp* RNAi treatment (**Figure**  
160 **1- Figure supplement 1**) suggesting that, even in the *rrf-3(pk1426)* sensitized  
161 background NSM could be particularly refractory to RNAi.

162 None of the TF RNAi clones affect all MA neurons, suggesting the absence of  
163 global regulators of MA fate, despite the fact that all MA neurons share *cat-*



164 1/VMAT expression. Nevertheless, a few RNAi clones show phenotypes in  
165 more than one neuron type, this is most prominent in dopaminergic neurons  
166 where 15 TFs RNAi clones affect more than one dopaminergic neuron type  
167 (**Table1** and **Data Source 1**).

168 Altogether, our RNAi screen provided a list of 91 TFs that could play a role in  
169 the specification of ten different *C. elegans* neuron-types at any developmental  
170 stage. Most neuron types require at least 10 different TFs for their correct  
171 specification. TFs often affect a unique neuron type with the exception of  
172 dopaminergic neurons, that share some, but not all, fate regulators.

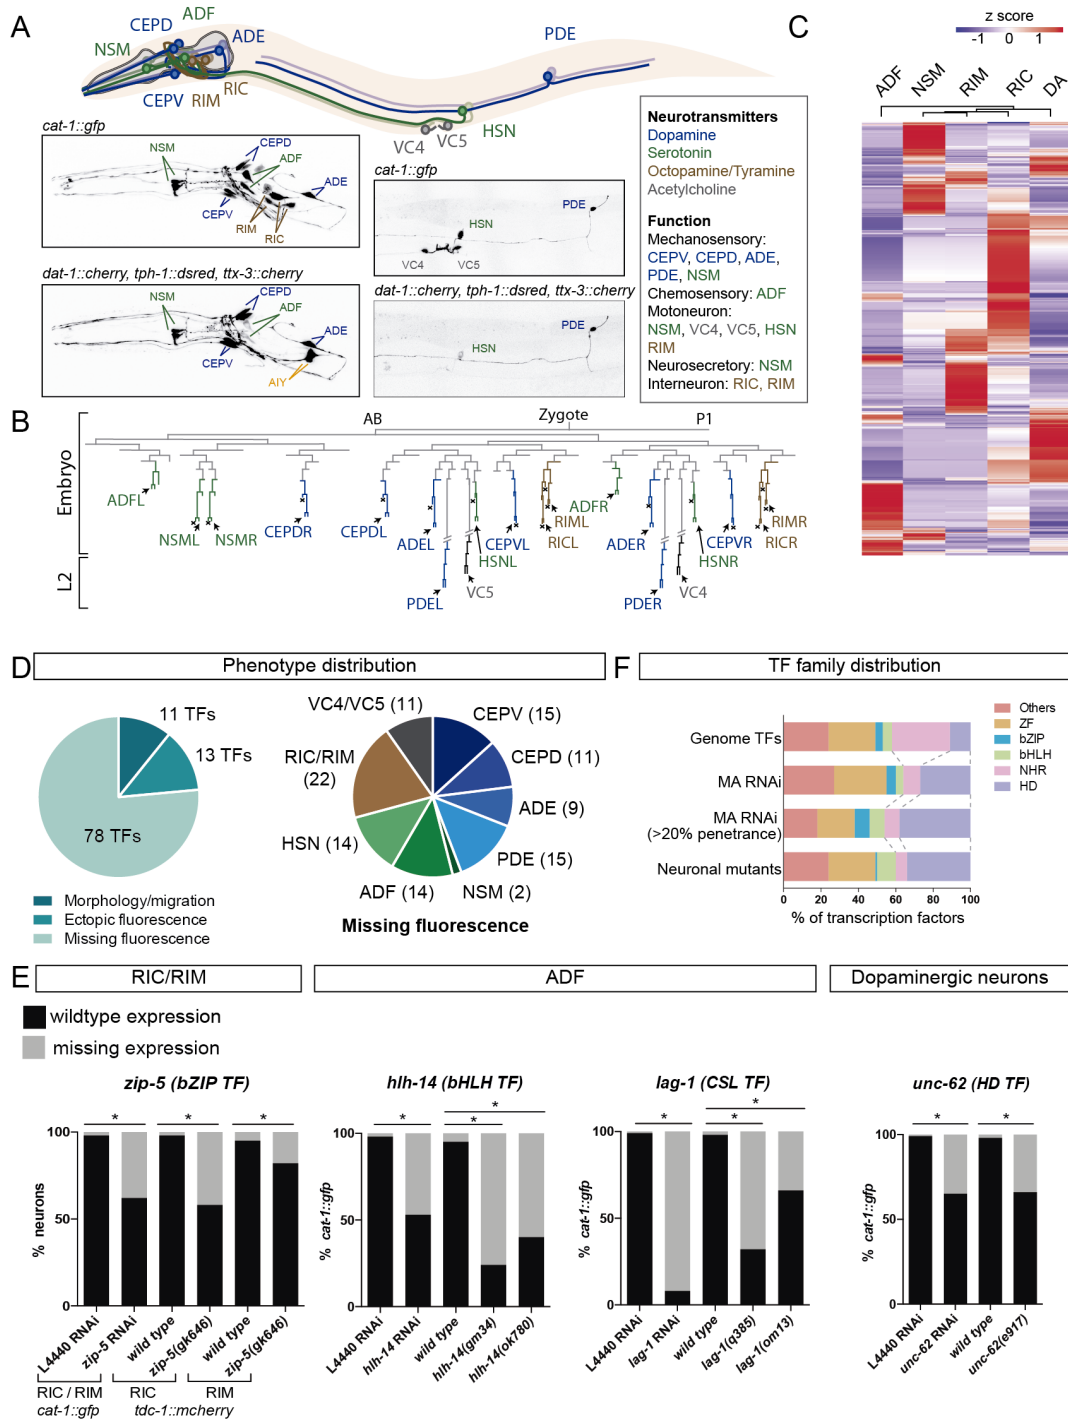

Figure 1

**Figure 1. A genome wide transcription factor RNAi screen reveals specific TF-families are required for the specification of all monoaminergic neuron types.**

**A)** *cat-1::gfp* (*otIs224*) reporter strain labels nine classes of MA neurons (dopaminergic in blue, serotonergic in green and tyraminergetic and octopaminergic in brown) and the VC4 and VC5 cholinergic motoneurons. AIM and RIH serotonergic neurons are not labeled by this reporter. HSN is both serotonergic and cholinergic. For the RNAi screen the dopaminergic *dat-1::mcherry* (*otIs181*) and serotonergic *tph-1::dsred* (*vsIs97*) reporters were also used together with *otIs224*. *txx-3::mcherry* reporter, labelling AIY is co-integrated in *otIs181* but was not scored.

**B)** Developmental *C. elegans* hermaphrodite lineage showing the diverse origins of neurons analyzed in this study.

**C)** Heatmap showing the disparate transcriptomes of the different MA neurons. Dopaminergic neurons (DA) cluster in one category because they are molecularly very similar. Data obtained from Larval L2 single-cell RNA-seq experiments (Cao et al., 2017). PDE, HSN, VC4 and VC5 are not yet mature at this larval stage.

**D)** Phenotype distribution of TF RNAi screen results. 91 RNAi clones produce 102 phenotypes as some TF RNAi clones are assigned to more than one cell and phenotypic category. Most neuron types are affected by knock down of at least 10 different TFs. We could not differentiate between RIC and RIM due to proximity and morphological similarity, thus they were scored as a unique category. See also **Table 1**, **Figure 1-S1** and **Data Source 1** for details on TF RNAi library and raw data of RNAi screen results.

**E)** Mutant allele analysis confirms a developmental role for *zip-5* in RIC/RIM, *hlh-14* and *lag-1* in ADF and *unc-62* in dopaminergic neurons. n>50 each condition, \*: p<0.05 compared to wild type, Fisher exact test with Bonferroni correction for multiple comparisons.

**F)** TF family distribution of TFs associated to neuronal phenotypes in our MA RNAi screen and in published mutant alleles (wormbase). Homeodomain TFs are over-represented and of NHR TFs decreased compared to the genome distribution. See also **Table 1** and **Figure 1-S2**.

175  
176

**Table 1. TF RNAi screen results ordered by penetrance**

| TF            | TF family | Neuron type        | RNA penetrance (%) | Mutant phenotype | Allele                                       | Source                                               |
|---------------|-----------|--------------------|--------------------|------------------|----------------------------------------------|------------------------------------------------------|
| <i>lin-32</i> | bHLH      | PDE                | 90                 | Yes              | <i>e1926</i><br><i>gm239</i>                 | (Portman and Emmons, 2000)                           |
| <i>lag-1</i>  | CSL       | ADF                | 87                 | Yes              | <i>om13</i><br><i>q385</i>                   | This work                                            |
| <i>lin-28</i> | COLD BOX  | PDE                | 82                 |                  |                                              |                                                      |
| <i>lin-39</i> | HD        | VCs                | 78                 | Yes              | <i>n1760</i>                                 | (Potts et al., 2009)                                 |
| <i>unc-4</i>  | HD        | VCs                | 74                 | Yes              | <i>e120</i> ,<br><i>e2323</i>                | (Zheng et al., 2013)                                 |
| <i>lin-40</i> | ZF        | VCs                | 74                 |                  |                                              |                                                      |
| <i>unc-86</i> | HD        | HSN                | 69                 | Yes              | <i>n846</i>                                  | (Lloret-Fernández et al., 2018;<br>Sze et al., 2002) |
| <i>hlh-14</i> | bHLH      | ADF                | 69                 | Yes              | <i>ok780</i><br><i>gm34</i>                  | This work                                            |
| <i>sem-2</i>  | HMG       | HSN                | 67                 |                  |                                              |                                                      |
| <i>tra-1</i>  | ZF        | VCs                | 67                 |                  |                                              |                                                      |
| <i>hbl-1</i>  | ZF        | PDE                | 63                 |                  |                                              |                                                      |
| <i>pax-3</i>  | HD        | VCs                | 57                 |                  |                                              |                                                      |
| <i>ceh-20</i> | HD        | VCs                | 52                 | Yes              | <i>ay42</i>                                  | (Liu et al., 2006)                                   |
| <i>ham-1</i>  | WH        | CEPs               | 51                 | Yes              | <i>gt1984</i><br><i>ot339</i>                | (Offenburger et al., 2017)                           |
| <i>egl-5</i>  | HD        | HSN                | 48                 | Yes              | <i>n945</i>                                  | (Singhvi et al., 2008)                               |
| <i>ast-1</i>  | WH        | HSN                |                    |                  | <i>ot417</i><br><i>hd1</i><br><i>rh300</i>   | (Lloret-Fernández et al., 2018)                      |
|               |           |                    | 42                 | Yes              | <i>gk463</i>                                 |                                                      |
| <i>vab-15</i> | HD        | PDE                | 41                 |                  |                                              |                                                      |
| <i>sex-1</i>  | NHR       | HSN                | 41                 |                  |                                              |                                                      |
| <i>ast-1</i>  | ETS       | ADE<br>PDE         |                    |                  | <i>ot417</i><br><i>hd1</i><br><i>rh300</i>   | (Flames and Hobert, 2009)                            |
|               |           |                    | 41                 | Yes              | <i>gk463</i>                                 |                                                      |
| <i>nob-1</i>  | HD        | HSN                | 40                 |                  |                                              |                                                      |
| <i>hbl-1</i>  | ZF        | HSN                | 40                 |                  |                                              |                                                      |
| <i>unc-62</i> | HD        | ADE<br>PDE         |                    |                  | <i>e917</i>                                  | This work                                            |
|               |           |                    | 38                 | Yes              |                                              |                                                      |
| <i>lin-14</i> |           | HSN                |                    |                  | <i>e912</i><br><i>n179</i>                   | (Olsson-Carter and Slack, 2010)                      |
|               |           |                    | 35                 | Yes              |                                              |                                                      |
| <i>zip-5</i>  | bZIP      | RIC/RIM            | 33                 | Yes              | <i>ok646</i>                                 | This work                                            |
| <i>bed-3</i>  | ZF        | PDE                | 33                 |                  |                                              |                                                      |
| <i>lin-14</i> |           | VCs                | 33                 | Yes              | <i>n179</i>                                  | This work                                            |
| <i>ceh-20</i> | HD        | ADE<br>PDE         |                    |                  | <i>mu290</i> ,<br><i>ay42</i>                | (Doitsidou et al., 2013)                             |
|               |           |                    | 33                 | Yes              |                                              |                                                      |
| <i>sex-1</i>  | NHR       | ADF                | 32                 |                  |                                              |                                                      |
| <i>sem-4</i>  | ZF        | HSN                | 32                 | Yes              | <i>n2654</i>                                 | (Lloret-Fernández et al., 2018)                      |
| <i>unc-86</i> | HD        | NSM                | 31                 | Yes              | <i>n846</i>                                  | (Sze et al., 2002)                                   |
| <i>ref-2</i>  | ZF        | VCs                | 29                 |                  |                                              |                                                      |
| <i>lin-28</i> | COLD BOX  | HSN                |                    |                  | <i>n719</i>                                  | (Olsson-Carter and Slack, 2010)                      |
|               |           |                    | 29                 | Yes              |                                              |                                                      |
| <i>lim-4</i>  | HD        | ADF                |                    |                  | <i>yz3</i><br><i>yz12</i>                    | (Zheng et al., 2005)                                 |
|               |           |                    | 28                 | Yes              |                                              |                                                      |
| <i>ceh-43</i> | HD        | CEPs<br>ADE<br>PDE |                    |                  | <i>ot406</i><br><i>ot340</i><br><i>tm480</i> | (Doitsidou et al., 2013)                             |
|               |           |                    | 28                 | Yes              |                                              |                                                      |
| <i>hlh-3</i>  | bHLH      | HSN                | 27                 | Yes              | <i>tm1688</i>                                | (Lloret-Fernández et al., 2018)                      |
| <i>lin-14</i> |           | NSM                | 27                 | No               | <i>n179</i>                                  | This work                                            |
| <i>ceh-44</i> | HD        | PDE                | 27                 |                  |                                              |                                                      |
| C32E8.1       | bZIP      | CEPs<br>ADE<br>PDE |                    |                  |                                              |                                                      |
|               |           |                    | 25                 |                  |                                              |                                                      |
| <i>lin-26</i> | ZF        | PDE                | 23                 |                  |                                              |                                                      |

|                 |                                |                    |    |     |                                              |                                 |
|-----------------|--------------------------------|--------------------|----|-----|----------------------------------------------|---------------------------------|
| <i>nhr-2</i>    | NHR                            | RIC/RIM            | 22 |     |                                              |                                 |
| <i>vab-3</i>    | HD                             | CEPV<br>ADE<br>PDE | 21 | Yes | <i>ot266</i><br><i>ot292</i><br><i>ot346</i> | (Doitsidou et al., 2008)        |
| <i>egl-18</i>   | GATA                           | HSN                | 21 | Yes | <i>n475</i>                                  | (Lloret-Fernández et al., 2018) |
| <i>ceh-16</i>   | HD                             | PDE                | 21 | Yes | <i>ok841</i>                                 | (Huang et al., 2009)            |
| <i>ceh-12</i>   | HD                             | RIC/RIM            | 21 |     |                                              |                                 |
| <i>unc-62</i>   | HD                             | CEPs               | 21 | Yes | <i>e917</i>                                  | This work                       |
| <i>wrm-1</i>    | $\beta$ -catenin<br>/Armadillo | VCs                | 20 |     |                                              |                                 |
| <i>nhr-61</i>   | NHR                            | VCs                | 20 |     |                                              |                                 |
| <i>egl-46</i>   | ZF                             | HSN                | 20 | Yes | <i>sy628</i>                                 | (Lloret-Fernández et al., 2018) |
| <i>zip-10</i>   | bZIP                           | ADF                | 20 | No  | <i>ok3462</i>                                | This work                       |
| <i>egl-43</i>   | ZF                             | RIC/RIM            | 19 |     |                                              |                                 |
| <i>flh-1</i>    | ZF                             | ADF                | 19 |     |                                              |                                 |
| <i>ceh-27</i>   | HD                             | RIC/RIM            | 19 |     |                                              |                                 |
| <i>nhr-223</i>  | NHR                            | CEPs               | 19 |     |                                              |                                 |
| <i>row-1</i>    | ZF                             | CEPV               | 18 |     |                                              |                                 |
| <i>tbx-30</i>   | T - box                        | RIC/RIM            | 18 |     |                                              |                                 |
| <i>ztf-8</i>    | ZF                             | CEPV               | 18 |     |                                              |                                 |
| <i>unc-130</i>  | Fork Head                      | ADF                | 18 |     |                                              |                                 |
| <i>dnj-17</i>   | ZF                             | CEPs               | 18 | Yes | <i>ju1234</i>                                | This work                       |
| <i>R05D3.3</i>  | ZF                             | ADF                | 17 |     |                                              |                                 |
| <i>pqm-1</i>    | ZF                             | RIC/RIM            | 17 | No  | <i>ok485</i>                                 | This work                       |
| <i>nrh-148</i>  | NHR                            | RIC/RIM            | 17 |     |                                              |                                 |
| <i>sdh-1</i>    | ZF                             | RIC/RIM            | 17 |     |                                              |                                 |
| <i>sma-3</i>    | SMAD                           | RIC/RIM            | 17 |     |                                              |                                 |
| <i>dxbp-1</i>   | ZF                             | CEPV               | 17 |     |                                              |                                 |
| <i>lin-28</i>   | COLD BOX                       | VCs                | 17 |     |                                              |                                 |
| <i>pqn-21</i>   | ZF                             | ADF                | 16 |     |                                              |                                 |
| <i>scrt-1</i>   | ZF                             | RIC/RIM            | 16 |     |                                              |                                 |
| <i>ceh-37</i>   | HD                             | ADF                | 16 |     |                                              |                                 |
| <i>pha-4</i>    | GATA                           | HSN                | 15 |     |                                              |                                 |
| <i>pax-3</i>    | HD                             | ADF                | 15 |     |                                              |                                 |
| <i>ceh-27</i>   | HD                             | ADF                | 15 |     |                                              |                                 |
| <i>mef-2</i>    | MADS BOX                       | CEPs<br>ADE        | 15 | Yes | <i>gk633</i>                                 | This work                       |
| <i>cep-1</i>    | p53                            | CEPs<br>ADE        | 14 | No  | <i>ep347</i>                                 | This work                       |
| <i>vab-7</i>    | HD                             | RIC/RIM            | 14 |     |                                              |                                 |
| <i>nfyb-1</i>   | CBF                            | RIC/RIM            | 14 |     |                                              |                                 |
| <i>dro-1</i>    | CBF                            | CEPs<br>ADE        | 14 |     |                                              |                                 |
| <i>flh-2</i>    | ZF                             | ADF                | 14 |     |                                              |                                 |
| <i>mIs-2</i>    | HD                             | PDE                | 14 | Yes | <i>cc615</i>                                 | (Jiang et al., 2005)            |
| <i>odd-2</i>    | ZF                             | ADF                | 14 |     |                                              |                                 |
| <i>ceh-13</i>   | HD                             | RIC/RIM            | 13 |     |                                              |                                 |
| <i>zip-6</i>    | bZIP                           | RIC/RIM            | 13 |     |                                              |                                 |
| <i>ceh-36</i>   | HD                             | RIC/RIM            | 13 |     |                                              |                                 |
| <i>C27A12.2</i> | ZF                             | RIC/RIM            | 13 |     |                                              |                                 |
| <i>lin-48</i>   | ZF                             | CEPD               | 13 |     |                                              |                                 |
| <i>nfx-1</i>    | NF - X1                        | RIC/RIM            | 12 |     |                                              |                                 |
| <i>unc-55</i>   | NHR                            | CEPs               | 12 | Yes | <i>e1170</i>                                 | This work                       |
| <i>sta-1</i>    | STAT                           | RIC/RIM            | 12 |     |                                              |                                 |
| <i>sup-35</i>   | ZF                             | CEPV               | 11 |     |                                              |                                 |
| <i>R05D3.3</i>  | ZF                             | RIC/RIM            | 11 |     |                                              |                                 |
| <i>nhr-157</i>  | NHR                            | RIC/RIM            | 10 |     |                                              |                                 |

177 Only missing fluorescence phenotypes are shown. Grey background highlights allele  
178 analysis performed in this work. Red font indicates RNAi results not reproduced by  
179 mutant analysis. 31 out of 35 tested RNAi phenotypes show similar results by mutant  
180 analysis (9 from this study, 22 from others). Most TFs with known functions on MA  
181 specification show RNAi penetrance of at least 20%. While most RNAi clones not  
182 validated by mutant analysis show low penetrance.

183 **A specific set of transcription factor families controls monoaminergic**  
184 **neuron specification.**

185 We next focused our analysis on TF families instead of individual TF members.  
186 According to their DNA binding domain, *C. elegans* TFs can be classified into  
187 more than fifty different TF families (Narasimhan et al., 2015; Stegmaier et al.,  
188 2004) (**Data source 1**). bHLH, HD, ZF, bZIP and NHR comprise 75% of the TFs  
189 in the *C. elegans* genome. RNAi clones targeting these families also generate  
190 75% of the MA phenotypes (**Figure 1F**). However, we noticed that the  
191 prevalence of two TF families, HD and NRH TFs, differs from what would be  
192 expected from the number of TF members encoded in the genome (**Figure 1F**).  
193 In spite of representing only 12% of total TFs in the *C. elegans* genome, we  
194 found that 27% of RNAi clones showing a phenotype (21/78) belong to the HD  
195 family ( $p < 0.005$  Fisher exact test). In contrast, NHR TFs are under-represented  
196 when considering the total number of NHR TFs encoded in the genome (**Figure**  
197 **1F**). We found that only 9% of NHR-TF RNAi clones produce MA phenotypes,  
198 even though 30% of all *C. elegans* TFs belong to this family ( $p < 0.0001$ , Fisher  
199 exact test). NHR TF family has expanded in *C. elegans*, it is composed by 272  
200 members compared to less than 50 NRH TFs encoded in the human genome.  
201 Only 8% of the 272 *C. elegans* NHRs have orthologs in non-nematode species  
202 (Maglich et al., 2001; Taubert et al., 2011). Importantly, we found NHRs with  
203 non-nematode ortholgs are enriched for neuronal functions (43% of NHR TFs  
204 associated to a MA RNAi phenotype are conserved,  $p = 0.04$ , Fisher exact test).  
205 This observation suggests that among NHR members, those phylogenetically  
206 conserved have a prevalent role in neuron specification. The set of "high  
207 confidence" TFs with high penetrance phenotypes showed a similar TF family

208 distribution, with 37% HD TFs and 8% NHR TFs ( $p < 0.0001$ ,  $p = 0.0017$   
209 respectively, Fisher exact test) (**Figure 1F**).

210 Strikingly, we noticed a roughly similar TF family distribution when considering  
211 each (MA) neuron type separately (**Figure 1- Figure Supplement 2**). This  
212 distribution is also present when considering TFs involved in the specification of  
213 the ASE glutamatergic gustatory neuron, a non-MA neuron for which a whole  
214 genome RNAi screen has been performed (Poole et al., 2011), but not in the  
215 regulation of other processes such as innate immune response or muscle  
216 specification (**Figure 1- Figure Supplement 2** and **Data source 1**).

217 Thus, our results suggest there is a specific TF family distribution associated to  
218 neuron specification, however, false negative and false positive RNAi rates  
219 could bias our interpretation. Thus we next turned into genetic mutant analysis,  
220 mutant alleles for 95 *C. elegans* TFs display reported neuronal phenotypes  
221 (annotated in Wormbase), including neuron specification defects, migration,  
222 axon guidance or behavioral deficits. Of note, TF family distribution for these 95  
223 TFs is similar to the one observed in our MA RNAi screen (**Figure 1F**). HD  
224 family is also over-represented ( $p < 0.0001$ , Fisher exact test) while NHR TFs are  
225 less present than what would be expected from the number of NHRs in the  
226 genome ( $p < 0.0001$ , Fisher exact test). Five out of six NHR TFs producing  
227 known neuronal phenotypes have orthologs in non-nematode species, which  
228 constitutes a significant enrichment in conserved NHRs ( $p < 0.0001$  Fisher exact  
229 test). The exception being *odr-7*, a nematode specific NHR required for the  
230 terminal differentiation of AWA sensory neuron (Sengupta et al., 1994). In  
231 summary, this global mutant allele analysis validates the specific TF family  
232 distribution observed in our RNAi screen. Moreover, it also indicates that our

233 finding is not limited to the MA system and could apply generally in neuron-type  
234 specification programs.

235

236 **Identification of new transcription factors involved in dopaminergic**  
237 **terminal differentiation**

238 Next, we aimed to use our TF RNAi screen to specifically study the complexity  
239 of terminal differentiation programs. To date, at least one terminal selector has  
240 been assigned to 76 of the 118 *C. elegans* neuron types (Hobert, 2016). Of  
241 these, a maximum of three terminal selectors have been identified for each  
242 neuron. We recently found that a combination of six transcription factors work  
243 together as a TF collective to control terminal differentiation of the HSN  
244 serotonergic neuron (Lloret-Fernández et al., 2018), revealing that the HSN  
245 terminal differentiation program appears considerably more complex than any  
246 of the other types in which terminal selectors have been identified. Thus, we  
247 aimed to discern if HSN regulatory complexity constitutes the exception or the  
248 rule in *C. elegans* neuron-type terminal specification programs.

249 It is important to notice that we cannot distinguish *a priori* what of the identified  
250 TFs act as early lineage regulators or at the terminal differentiation step, as both  
251 roles lead to the loss of fluorescence cells. To circumvent this limitation, we  
252 decided to focus on the four dopaminergic neuron types that arise from different  
253 lineages. Early lineage determinants affect unique dopaminergic neuron types,  
254 for example *ceh-16*/HD TF is required for V5 lineage asymmetric divisions and  
255 thus controls PDE generation but not other dopaminergic neuron types (Huang  
256 et al., 2009) (**Table 1**). Conversely, all mature dopaminergic neurons converge  
257 in the same terminal differentiation program (Doitsidou et al., 2013; Flames and



258 Hobert, 2009). Consistently, RNAi clones targeting the three known  
259 dopaminergic terminal selectors (*ast-1*, *ceh-43* and *ceh-20*) show phenotypes  
260 for at least two out of the four dopaminergic neuronal pairs (**Figure 2 - Figure**  
261 **Supplement 1**). Accordingly, we reasoned that RNAi clones leading to similarly  
262 broad dopaminergic phenotypes could also play a role in dopaminergic terminal  
263 differentiation.

264 In addition to the three already known dopaminergic terminal selectors, we  
265 found ten TF RNAi clones affecting two or more dopaminergic neuron types  
266 (**Table 1**). To prioritize among these ten TFs, we focused on *unc-62*/MEIS-HD,  
267 *vab-3*/PAIRED-HD, *unc-55*/NHR and *mef-2*/MADS. These four TFs have  
268 reported roles on neuron specification and many TFs involved in terminal  
269 differentiation have pleiotropic effects in several neuronal types (Hobert, 2016)  
270 (**Figure 2 - Figure supplement 1 and Data source 1**). Thus, we next aimed to  
271 study if *unc-62*/MEIS-HD, *vab-3*/PAIRED HD, *unc-55*/NHR and *mef-2*/MADS  
272 play a role in dopaminergic terminal differentiation.

273

## 274 ***unc-62*/MEIS-HD and *vab-3*/PAIRED-HD TFs are required for dopaminergic**

## 275 **lineage specification and dopaminergic terminal differentiation**

276 We used mutant alleles to verify RNAi phenotypes and further characterize the  
277 role of these TFs in dopaminergic fate. *unc-62* has multiple functions in  
278 development and null alleles are embryonic lethal precluding analysis of  
279 dopaminergic differentiation defects (Van Auken et al., 2002). Three viable  
280 hypomorphic alleles *e644*, *mu232* and *e917* show expression defects of a *cat-*  
281 *2*/tyrosine hydroxylase reporter, the rate-limiting enzyme for dopamine  
282 synthesis (**Figure 2A, B, E and Figure 2 - Figure Supplement 2**). For further

283 characterization, we focused on *unc-62(e917)* allele as it showed higher  
284 penetrance. *unc-62(e917)* mutant shows broad defects in expression of the  
285 dopamine pathway genes in ADE and PDE (*bas-1*, *cat-2*, *cat-4* and *cat-1*  
286 reporter expression affected) while CEPV shows small but significant defects in  
287 *cat-2* and *cat-1* reporter expression (**Figure 2C-G**). Expression of additional  
288 effector genes not directly related to dopaminergic biosynthesis, such as the ion  
289 channel *asic-1*, is also affected in *unc-62(e917)* mutants (**Figure 2H**).

290 Despite the broad ADE phenotypes of *unc-62(e917)*, *dat-1* gene expression is  
291 unaffected in this neuron revealing the presence of the cell and discarding that  
292 the lineage is affected. In contrast, *unc-62(e917)* shows loss of PDE expression  
293 for all analyzed reporters raising the possibility of lineage specification defects.

294 Three additional observations support this idea: 1) *unc-62(e917)* mutants show  
295 correlated *asic-1* reporter expression defects in PDE and its sister cell PVD  
296 (26/60 animals *asic-1::gfp* lost in both cells, 34/60 unaffected expression in  
297 both, 0/60 animals only PDE or PVD expression affected), suggesting either  
298 *unc-62* is required for terminal differentiation of both cells or that the lineage is  
299 affected; 2) *unc-62(e917)* mutant animals show PDE expression defects for the  
300 ciliated marker *ift-20* and the panneuronal reporter *rab-3* (**Figure 2 - Figure**  
301 **supplement 2**), which are usually unaffected in terminal differentiation mutants  
302 (Flames and Hobert, 2009; Stefanakis et al., 2015). These results also suggest  
303 the PDE neuron itself is absent in *unc-62(e917)* mutants; 3) Finally, *ceh-*  
304 *20/PBX* HD dopaminergic terminal selector is required for correct PDE lineage  
305 formation (Doitsidou et al., 2013). MEIS and PBX factors are known to  
306 physically and genetically interact in different tissues in several model  
307 organisms (Jiang et al., 2009; Knoepfler et al., 1997; Maeda et al., 2002;

308 Noman et al., 2017; Potts et al., 2009; Rieckhof et al., 1997; Vlachakis et al.,  
309 2001). Thus one possibility is that CEH-20 and UNC-62 work together in the  
310 PDE lineage determination. Altogether, our results are consistent with a dual  
311 role for *unc-62* in ADE and CEPV terminal differentiation and in PDE lineage  
312 specification. The early role in PDE lineage formation precludes the assignment  
313 of later roles for *unc-62* in this dopaminergic neuron type.

314 To characterize the role of *vab-3* in dopaminergic terminal differentiation we  
315 analyzed *vab-3(ot346)*, a deletion allele originally isolated from a forward  
316 genetic screen for dopaminergic mutants (**Figure 2B**) (Doitsidou et al., 2008).  
317 Reported defects in *vab-3(ot346)* consists of a mixed phenotype of extra and  
318 missing *dat-1::gfp* CEPs and accordingly it was proposed to act as an early  
319 determinant of CEP lineages (Doitsidou et al., 2008). Our RNAi experiments  
320 reproduce the mixed phenotype of extra and missing CEPs but also displays  
321 missing reporter expression for ADE and PDE (**Figure 2 - Figure supplement**  
322 **1**). Thus, to investigate if, as suggested by RNAi experiments, *vab-3* is also  
323 required for dopaminergic terminal fate, we analyzed the expression of all  
324 dopamine pathway gene reporters in *vab-3(ot346)*. We found that, in addition to  
325 the already reported mixed phenotype of extra and missing *dat-1::gfp*  
326 expressing CEPs, *vab-3(ot346)* animals show significant *cat-4* and *bas-1*  
327 expression defects in ADE and *cat-2* expression defects in ADE and PDE  
328 (**Figure 2D, E, F**), supporting a broad role for *vab-3* in dopaminergic terminal  
329 differentiation. Importantly, *dat-1* and *cat-1* reporter expression is unaffected in  
330 ADE and PDE which rules out lineage defects as the underlying cause of the  
331 phenotype for these neuron types (**Figure 2C, G**). We confirmed CEP lineage  
332 defects in *vab-3(ot346)* mutants with the analysis of *gcy-36* and *mod-5*

333 expression, effector genes expressed in URX (sister cell of CEPD) and AIM  
334 (cousin of CEPV) respectively (**Figure 2 - Figure supplement 2**).

335 Thus, similar to *ceh-20* and *unc-62*, *vab-3* seems to have a dual role in  
336 dopaminergic specification: it is required for proper ADE and PDE terminal  
337 differentiation and for correct CEP lineage generation. A potential role for *vab-3*  
338 in CEPs terminal differentiation could be masked by the earlier requirement in  
339 lineage determination.

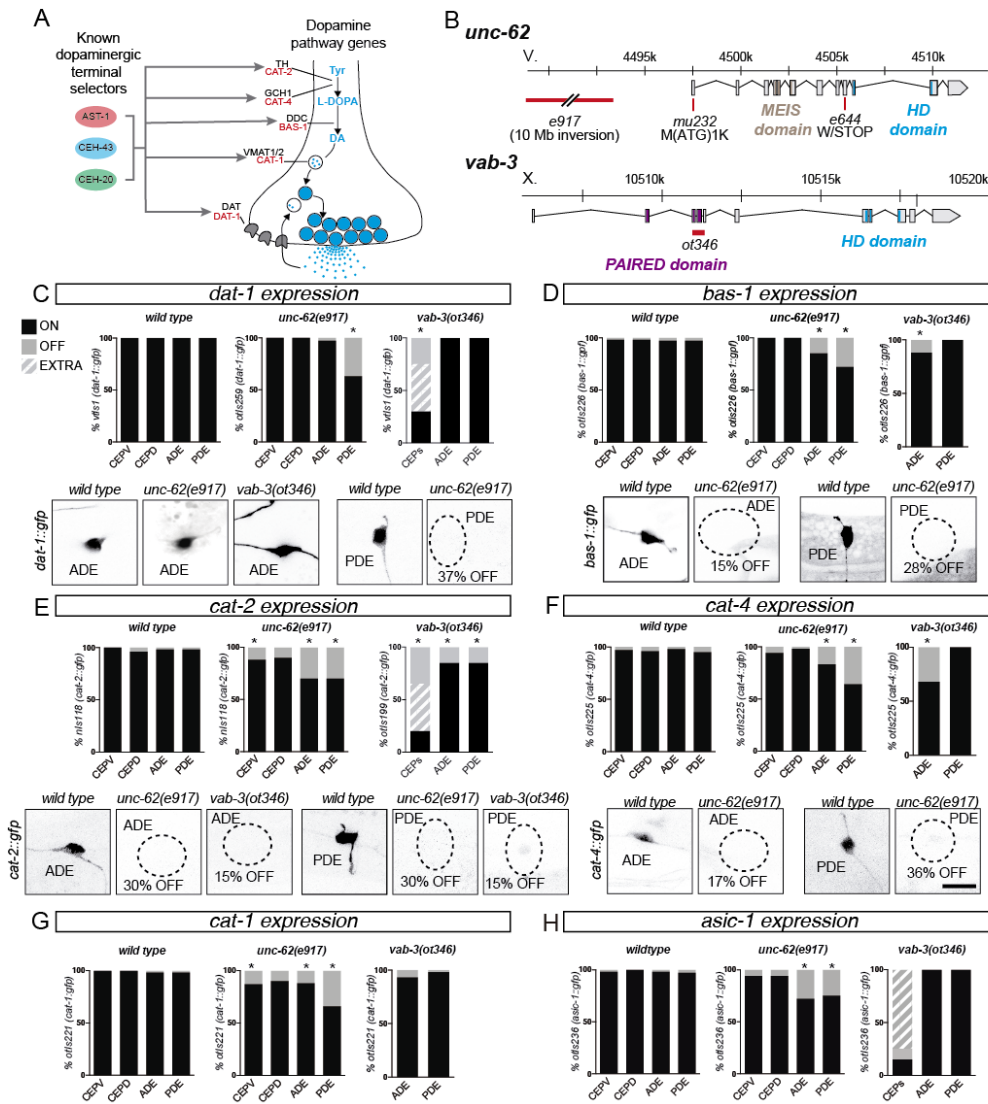

Figure 2

**Figure 2. *unc-62*/MEIS HD and *vab-3*/PAIRED HD are required for correct dopaminergic specification.**

**A)** AST-1/ETS, CEH-43/DLL HD and CEH-20/PBX HD are known terminal selector of dopaminergic neurons and directly activate expression of the dopamine pathway genes. CAT-1/VMAT1/2: vesicular monoamine transporter, CAT-2/TH: tyrosine hydroxylase, CAT-4/GCH1: GTP cyclohydrolase, BAS-1/DDC: dopamine decarboxylase, DAT-1/DAT: Dopamine transporter, DA: dopamine, Tyr: tyrosine.

**B)** Schematic representation of *unc-62* and *vab-3* gene loci and alleles used in the analysis.

**C-G)** Dopamine pathway gene expression analysis in *unc-62(e917)* and *vab-3(ot346)* alleles. For *cat-2* and *dat-1* analysis, disorganization of *vab-3(ot346)* head neurons precluded us from distinguishing CEPV from CEPD and thus are scored as a unique CEP category. For *bas-1*, *cat-4* and *cat-1* analysis, disorganization of *vab-3(ot346)* head precluded the identification of CEPs among other GFP expressing neurons and thus only ADE and PDE scoring is shown. Wild type *otIs199(cat-2::gfp)* expression is similar to *nIs118* and not shown in the figure. n>50 each condition, \*: p<0.05 compared to wildtype. Fisher exact test. Scale: 10  $\mu$ m. See **Figure 2-S2** for analysis of additional alleles, markers and lineage defects.

**H)** *asic-1* sodium channel expression analysis in *unc-62(e917)* and *vab-3(ot346)* alleles.

341 ***unc-55/NHR* and *mef-2/MADS* TFs provide robustness to the dopaminergic**  
342 **terminal differentiation program**

343 Next, we analyzed dopamine pathway gene expression in two different mutant  
344 alleles for *unc-55* and *mef-2* (**Figure 3A**). Similar to RNAi effects (**Figure 2 -**  
345 **Figure Supplement 1**), *mef-2(gk633)* displays significant defects in *cat-1::gfp*  
346 expression, however, these defects are not observed in *mef-2(gv1)* mutants  
347 (**Figure 3B**). Both alleles are predicted nulls, *mef-2(gk633)* deletes the promoter  
348 and first exon abolishing transcription, while *mef-2(gv1)* produce a truncated  
349 transcript that would be degraded by non-sense mediated decay (**Figure 3A**).  
350 Some alleles that activate the non-sense mediated decay in zebrafish and  
351 mouse have been recently shown to activate expression of compensatory  
352 genes inducing what has been termed transcriptional adaptation (El-Brolosy et  
353 al., 2019). Transcriptional adaptation is also present in *C. elegans* (Seroby et  
354 al., 2020), and then it is possible that the lack of dopaminergic phenotype in  
355 *mef-2(gv1)* mutants compared to *mef-2(gk633)* is due to transcriptional  
356 adaptation.

357 In contrast, neither of the two predicted *unc-55* null alleles, the early stop *unc-*  
358 *55(e1170)* that induce non-sense mediated decay and the *unc-55(gk818)*  
359 deletion allele that likely abolish all *unc-55* transcription, reproduce the *cat-1*  
360 expression defects detected by RNAi experiments (**Figure 3B**). Similarly,  
361 expression of other dopaminergic effector genes is also unaffected in *unc-*  
362 *55(e1170)* and *unc-55(gk818)* mutants (**Figure 3 - Figure Supplement 1**). This  
363 discrepancy suggests that *unc-55* RNAi phenotype could be a false positive due  
364 to off target RNAi effects, alternatively the total absence of *unc-55* could be  
365 genetically compensated in both mutant alleles while, for currently unknown

366 reasons, *unc-55* RNAi in *rrf-3* background cannot be totally compensated. Thus,  
367 we hypothesized single mutations in *mef-2* and *unc-55* genes could display  
368 small or no-phenotypes due to mutational robustness of the dopaminergic gene  
369 regulatory network. Double mutant analysis shows this to be the case: *unc-*  
370 *55(e1170)* shows strong synergism with both *ast-1(hd1)* and *ceh-43(ot406)*  
371 mutants in the regulation of *dat-1::gfp* expression in PDE (**Figure 3C-D**), while  
372 *mef-2(gk633)* and *ast-1(hd1)* act synergistically in the regulation of *cat-1::gfp*  
373 expression in CEPs and ADE (**Figure 3E-F and Figure 3 - Figure supplement**  
374 **2**).

375 In summary, we find *unc-55* and *mef-2* RNAi experiments and mutant analysis  
376 show differing results, the nature of these discrepancies is currently not well  
377 understood and could be explained in part by transcriptional adaptation  
378 mechanisms. Single mutant analysis reveals that the lack of these two factors  
379 individually can be compensated, however, synergistic effects found with known  
380 dopaminergic terminal selectors suggest a *bona fide* requirement for *unc-55*  
381 and *mef-2* in dopaminergic terminal specification.

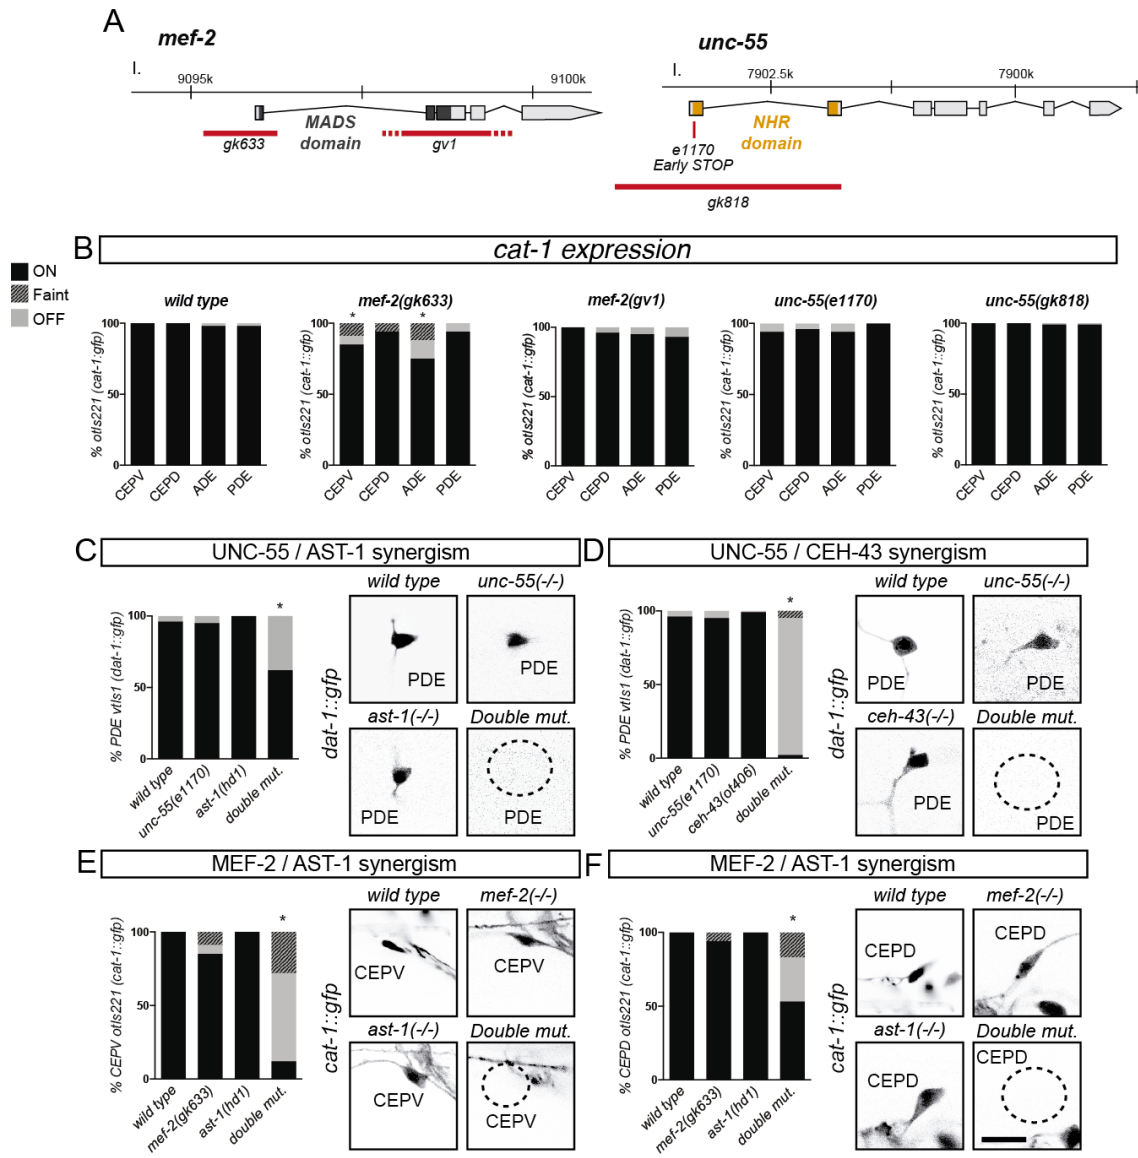

Figure 3

**Figure 3. *mef-2*/MADS and *unc-55*/NHR TFs provide robustness to the dopaminergic differentiation program.**

**A)** Schematic representation of *mef-2* and *unc-55* gene loci and alleles used in the analysis. All alleles are predicted nulls, *mef-2(gv1)* and *unc-55(e1170)* alleles are predicted to induce RNA decay response while *mef-2(gk633)* and *unc-55(gk818)* produce no mRNA transcript. *unc-55(gk818)* deletion also removes F55D12.6 gene that is located inside *unc-55* first intron.

**B)** *cat-1* expression defects produced by *mef-2* and *unc-55* RNAi are not reproduced in *mef-2(gv1)*, *unc-55(e1170)* and *unc-55(gk818)*. *mef-2(gk633)*, shows similar *cat-1* expression defects to RNAi experiments, supporting a role for this TF in dopaminergic terminal differentiation. n>50 each condition, \*: p<0.05 compared to *wildtype*. Fisher exact test. See also **Figure 3-S1**, for analysis of additional markers in *unc-55* and *mef-2* single mutants.

**C-F)** Double mutant analysis of *unc-55* and *mef-2* with known dopaminergic terminal selectors *ast-1* and *ceh-43* reveals synergistic effects. n>50 each condition, \*: p<0.05. Fisher exact test. Scale: 10  $\mu$ m. See also **Figure 3-S2** for additional double mutant analysis.



383 **Cis-regulatory modules of dopaminergic effector genes contain functional**  
384 **binding sites for UNC-62, VAB-3, UNC-55 and MEF-2**

385 We have previously reported functional binding sites for *ast-1*, *ceh-43* and *ceh-*  
386 *20* in the *cis*-regulatory modules of the dopamine pathway genes (Doitsidou et  
387 al., 2013; Flames and Hobert, 2009). To analyze if the new regulators of  
388 dopaminergic terminal fate could also directly activate dopaminergic effector  
389 gene expression we focused on the *cis*-regulatory analysis of *dat-1* and *cat-2*,  
390 the two dopamine pathway genes exclusively expressed in the dopaminergic  
391 neurons.

392 The *dat-1* minimal *cis*-regulatory module (*dat-1p2*) contains previously  
393 described functional binding sites (BS) for AST-1 (ETS BS), CEH-20 (PBX BS)  
394 and CEH-43 (HD BS) (**Figure 4A**) (Doitsidou et al., 2013; Flames and Hobert,  
395 2009). In addition, we found consensus binding sites for MEF-2 (MADS BS),  
396 UNC-55 (COUP-TF BS), UNC-62 (MEIS BS) and VAB-3 (PAIRED BS) (**Figure**  
397 **4A**). Site directed mutagenesis of predicted MADS, COUP-TF, MEIS and  
398 PAIRED BS leads to GFP expression defects, mainly in the PDE (**Figure 4A**  
399 **and Figure 4 - Figure supplement 1**). VAB-3 protein contains two DNA binding  
400 domains, PAIRED and HD where each DNA domain fulfills specific functions  
401 (Brandt et al., 2019). Interestingly, we find that one of the two already identified  
402 functional HD BS matches a PAIRED-type HD consensus (HTAATTR, labeled  
403 as HD\* in **Figure 4**) suggesting it could be recognized by VAB-3 and/or CEH-  
404 43. Finally, combined COUP-TF and HD\* BS mutation shows synergistic effects  
405 in the ADE (**Figure 4A and Figure 4 - Figure supplement 1**).

406 The *cat-2* minimal *cis*-regulatory module (*cat-2p21*), in addition to the previously  
407 described ETS, PBX and HD BS (Doitsidou et al., 2013; Flames and Hobert,

408 2009) also contains predicted MADS, MEIS and PAIRED BS but lacks any  
409 predicted COUP-TF site (**Figure 4B**). Point mutation in PAIRED and MEIS BS  
410 show strong GFP expression defects while MADS BS mutation had only a small  
411 effect in the PDE (**Figure 4B** and **Figure 4 - Figure supplement 1**). Similar to  
412 minimal *dat-1 cis*-regulatory module, one of the predicted HD BS matches the  
413 PAIRED HD consensus (HTAATTR, labeled as HD\* in **Figure 4**).

414 Our results suggest that the four additional dopaminergic TFs (UNC-62, VAB-3,  
415 MEF-2 AND UNC-55) may act together with other known terminal selectors  
416 (AST-1, CEH-20 and CEH-43) to directly activate dopaminergic effector gene  
417 expression.

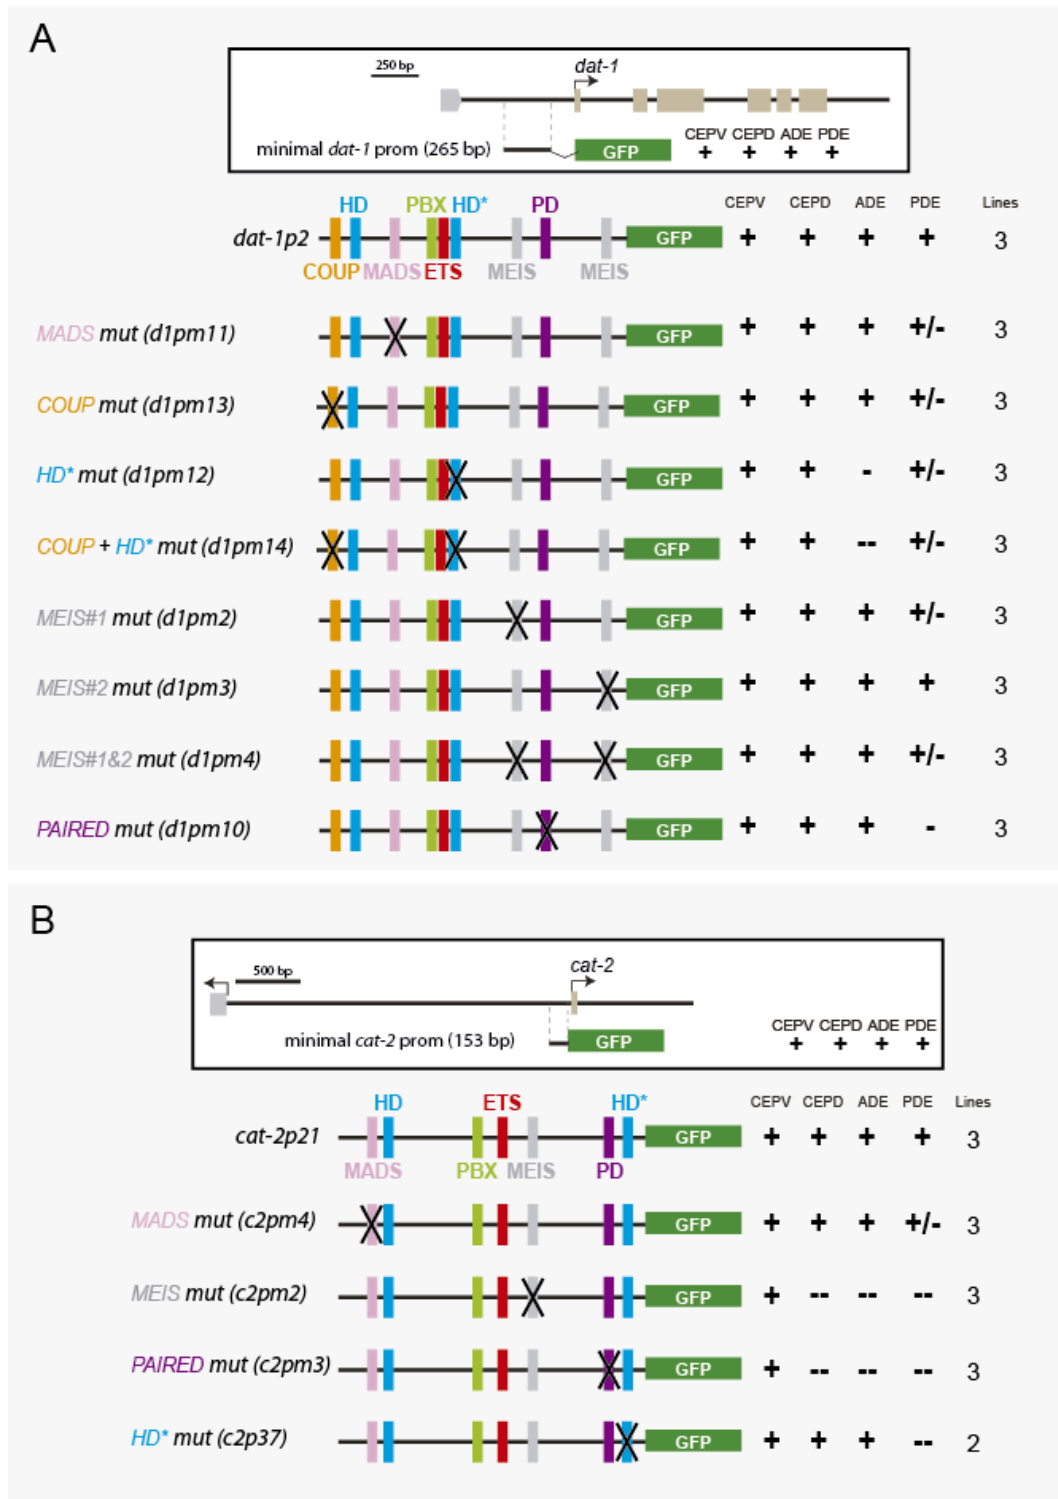

Figure 4

**Figure 4. *cis*-regulatory analysis of dopamine pathway genes reveals functional binding sites for UNC-62, VAB-3, UNC-55 and MEF-2.**

**A)** *dat-1* minimal dopaminergic *cis*-regulatory module (*dat-1p2*) mutational analysis. *dat-1p2* contains predicted AST-1/ETS, CEH-20/PBX HD, CEH-43/DLL HD, UNC-62/MEIS, VAB-3/PAIRED, UNC-55/COUP-TF and MEF-2/MADS binding sites. Functionality of ETS, PBX and HD sites has been previously shown (Doitsidou et al., 2013; Flames and Hobert, 2009). Point mutation of MADS, COUP-TF, MEIS and PAIRED (PD) BS also affect GFP expression in dopaminergic cells. HD\* represents a PAIRED-type HD consensus (HTAATTR). Black crosses represent point mutations to disrupt the corresponding TFBS. +: > 70% of mean wild type construct values; +/-: expression values 70–30% lower than mean wild type expression values; -: values are less than 30% of mean wild type values. --: less than 5% of GFP expression. n > 60 cells per line. See **Figure 5 - Figure Supplement 1** for raw values and nature of the mutations

**B)** *cat-2* minimal dopaminergic *cis*-regulatory module (*cat-2p21*) mutational analysis. In addition to published functional ETS, PBX and HD binding sites (Doitsidou et al., 2013; Flames and Hobert, 2009), MADS, MEIS and PAIRED (PD) BS are also required for correct GFP reporter expression. Black crosses represent point mutations to disrupt the corresponding TFBS. +: > 70% of mean wild type construct values; +/-: expression values 70–30% lower than mean wild type expression values; -: values are less than 30% of mean wild type values. --: less than 5% of GFP expression. n > 60 cells per line. See **Figure 5 - Figure Supplement S1** for raw values and nature of the mutations

419

420 **VAB-3, UNC-55 and MEF-2 act cell-autonomously in dopaminergic**  
421 **neurons**

422 Next, we aimed to explore if the new identified factors act cell autonomously for  
423 dopaminergic fate induction. We found *unc-62*, *vab-3*, *mef-2* fosmid reporters  
424 and a transcriptional reporter for *unc-55* are expressed in dopaminergic  
425 neurons and expression is maintained throughout the life of the animal (**Figure**  
426 **5A**). At young adult stage *unc-62* expression was not detected in CEPs, which  
427 is consistent with the stronger ADE and PDE phenotype of *unc-62* mutants.

428 Next, we investigated epistatic relationships among members of the  
429 dopaminergic terminal regulatory program. AST-1 is the TF with the strongest  
430 dopaminergic phenotype, and all analyzed dopaminergic effector genes are lost  
431 in *ast-1(hd92)* null mutants (Flames and Hobert, 2009). We thus aimed to study  
432 if AST-1 acts upstream of any of the newly identified dopaminergic TFs. *ast-*  
433 *1(hd92)* animals arrest at fist larval stage before PDE neuron birth and show  
434 morphological head disorganization and loss of expression for all dopaminergic

435 pathway genes. *unc-62*, *vab-3* and *mef-2* TFs are expressed in many neurons  
436 in the head in addition to dopaminergic neurons, thus, to identify dopaminergic  
437 head neurons we used a *ift-20* pan-cilia reporter for which we detected  
438 expression in approximately 30 neurons in the head, including the six  
439 dopaminergic neurons. We first confirmed that the total number of *ift-20* positive  
440 cells is similar in *ast-1(hd92)* and *wild type* worms, this was expected as *ast-1*  
441 does not regulate expression of cilia components (Flames and Hobert, 2009).  
442 Next we found *ast-1(hd92)* mutant animals show similar numbers of double  
443 positive *ift-20/unc-62* and *ift-20/mef-2* cells to controls, suggesting *ast-1* is not  
444 required for the expression of these TFs in dopaminergic neurons (**Figure 5B**).  
445 In contrast, *ast-1(hd92)* shows a small but significant decrease in the number of  
446 *ift-20* cells co-expressing *vab-3* (**Figure 5B**). A mean of two *ift-20* cells lose *vab-*  
447 *3* expression in *ast-1(hd92)* mutants indicating either a low penetrance for the  
448 phenotype or that *ast-1* is upstream *vab-3* only in one of the three pairs of  
449 dopaminergic neurons in the head. We could not distinguish between the two  
450 possibilities due to morphological disorganization of the head in *ast-1(hd92)*  
451 mutants. Finally, *unc-55* expression in the head was too faint to perform this  
452 quantitative analysis. In summary, it seems that, *unc-62*, *vab-3* and *mef-2* act  
453 mostly in parallel to *ast-1*.  
454 We then performed neuron-type-specific rescue experiments to test for cell  
455 autonomous effects of these TFs. *unc-62* codes for eight different coding  
456 isoforms, *unc-62 isoform a (unc-62a)* is expressed neuronally and it is the only  
457 isoform commonly affected in *e917*, *mu232* and *e644* alleles, which all show  
458 dopaminergic defects. We expressed *unc-62a* under the *dat-1* promoter as *dat-*  
459 *1* expression is unaffected in CEPs and ADE in *unc-62(e971)* mutants (**Figure**

460 **2C)** however we find none of the two transgenic lines produce significant rescue  
461 of the *unc-62(e971)* phenotype (**Figure 5C**), failure to rescue could indicate  
462 *unc-62* might be required in the ADE earlier than the onset of *dat-1* expression,  
463 alternatively it could act non cell autonomously or require additional isoforms.  
464 A similar strategy was used for *vab-3(ot346)* rescue experiments. *vab-3* codes  
465 for three isoforms, but only the long isoform *vab-3a* contains both the PAIRED  
466 and the HD protein domains. Expression of *vab-3a* under the *dat-1* promoter is  
467 sufficient to rescue *cat-2* expression defects in ADE, demonstrating a cell  
468 autonomous and terminal role for *vab-3* in neuron specification (**Figure 5D**). As  
469 expected, *vab-3(ot346)* CEP lineage defects were not rescued, as the promoter  
470 used for *vab-3* rescue (*dat-1prom*) is only expressed in terminally differentiated  
471 CEPs.  
472 For *mef-2* and *unc-55* rescue experiments we used double mutants with *ast-*  
473 *1(hd1)*, as single mutants do not show obvious dopaminergic expression  
474 defects. *unc-55* codes for two isoforms. Expression of *unc-55* long isoform (*unc-*  
475 *55a*) did not produce significant rescue of *dat-1::gfp* expression in the PDE  
476 (**Figure 5E**). Although the other isoform, *unc-55b*, has been reported to be  
477 expressed only in males (Shan and Walthall, 2008), it is possible that *unc-55b*  
478 could be required in hermaphrodite dopaminergic neuron specification.  
479 Alternatively, earlier *unc-55* expression or non-cell autonomous actions for *unc-*  
480 *55* could explain failure to rescue with our experimental approach. Nonetheless,  
481 as will be explained in the following section, the mouse ortholog of *unc-55*,  
482 Nr2f1 (Coup-tf1) is able to rescue *ast-1(hd1)*, *unc-55(e1170)* double mutant  
483 phenotype (**Figure 5E**). Nr2f1 rescue of the dopaminergic phenotype supports

484 a cell autonomous and terminal role in dopaminergic specification for these  
485 NHR TFs.  
486 Finally, *mef-2* codes for a single isoform, we find *mef-2* cDNA expression under  
487 the *bas-1* promoter rescues loss of CEPV and CEPD *cat-1::gfp* expression in  
488 *ast-1(hd1); mef-2(gk633)* double mutants, demonstrating a cell autonomous  
489 and terminal role for *mef-2* in dopaminergic neuron specification (**Figure 5F**).

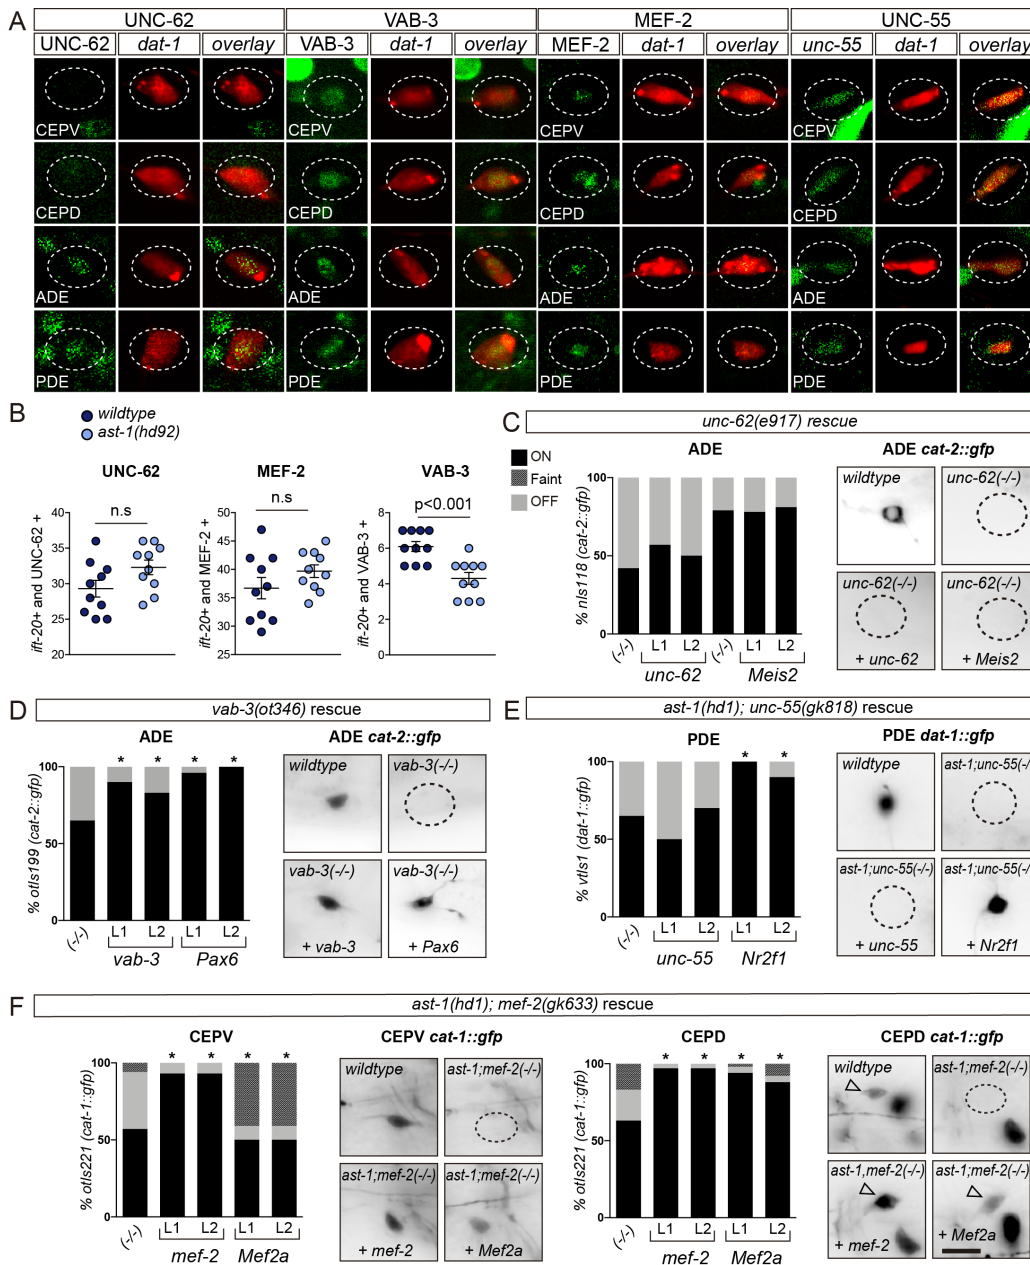

Figure 5

**Figure 5. The dopaminergic terminal differentiation program is phylogenetically conserved.**

**A)** Expression analysis of UNC-62 (*wgIs600*), VAB-3 (*vlcEx1046*) and MEF-2 (*wgIs301*) GFP tagged fosmid reporter and *unc-55::gfp* (*vlcEx498*) transcriptional reporter at L4 larval stage shows co-localization with *dat-1::cherry* (*otIs181*) dopaminergic reporter. UNC-62 expression was only detected in ADE and PDE at this developmental stage.

**B)** Expression analysis of head sensory cells (*ift-20* positive) co-expressing UNC-62, VAB-3 and MEF-2 in wildtype and *ast-1(hd92)* null mutants. n=10 each genotype. Two-tail unpaired T-test.

**C-F)** Cell autonomous rescue of *unc-62*, *vab-3* single mutants and *ast-1;mef-2* and *ast-1;unc-55* double mutants with *C. elegans* and mouse ortholog cDNAs. *dat-1* promoter was used to drive expression in dopaminergic neurons in *unc-62* and *vab-3* mutants and *bas-1* promoter to drive expression in *ast-1;mef-2* and *ast-1;unc-55* double mutants. L1 and L2 represent two independent transgenic lines. Arrowheads in D point CEPD, the additional neuron is the ADF, unaffected in these mutants. Scale: 10  $\mu$ m n>50 each condition, \*: p<0.05 compared to mutant phenotype. Fisher exact test with Bonferroni correction for multiple comparisons.



491 **The dopaminergic terminal differentiation program is phylogenetically**  
492 **conserved**

493 Mouse orthologs for *ast-1*, *ceh-43* and *ceh-20* (Etv1, Dlx2 and Pbx1  
494 respectively) are required for mouse olfactory bulb dopaminergic terminal  
495 differentiation, thus the dopaminergic terminal differentiation program seems to  
496 be phylogenetically conserved (Brill et al., 2008; Cave et al., 2010; Flames and  
497 Hobert, 2009; Remesal et al., 2020). Remarkably, Meis2, the mouse ortholog of  
498 *unc-62*, Pax6, the mouse ortholog of *vab-3* and Nr2f1, the mouse ortholog of  
499 *unc-55* are also necessary for olfactory bulb dopaminergic specification  
500 (Agoston et al., 2014; Bovetti et al., 2013; Brill et al., 2008). Thus we next  
501 performed similar rescue experiments using mouse orthologs for the new  
502 dopaminergic TFs. Pax6, Mef2a and Nr2f1 are able to rescue *vab-3*, *mef-2* and  
503 *unc-55* mutant phenotypes respectively. However, Meis2 did not produce  
504 significant rescue of *unc-62* mutants, similar to *unc-62* cDNA failure to rescue,  
505 suggesting MEIS factors might be also required at earlier time points (**Figure 5**  
506 **C-F**).

507 Altogether, our data reinforce a model in which known dopaminergic terminal  
508 selectors *ast-1*/Etv1, *ceh-43*/Dlx2 and *ceh-20*/Pbx1, act together with *unc-*  
509 *62*/Meis2, *vab-3*/Pax6, *mef-2*/Mef2a and *unc-55*/Nr2f1 to regulate dopaminergic  
510 terminal differentiation.

511

512 **A dopaminergic regulatory signature is preferentially associated to**  
513 **dopaminergic neuron effector genes**

514 Thus at least seven TFs seem to be required for correct *C. elegans*  
515 dopaminergic terminal specification. A seemingly complex combination of TFs

516 activates expression of the mature HSN transcriptome (Lloret-Fernández et al.,  
517 2018). Our findings suggest this TF complexity might be a common theme in  
518 neuronal terminal differentiation programs. Then, why are these complex  
519 combinations of TFs required for gene expression? Our *unc-55* and *mef-2*  
520 analysis shows that one possible reason might be ensuring robustness of  
521 expression. In addition, we previously described that TFBS clusters for the HSN  
522 TF collective are preferentially found in HSN expressed genes and can be used  
523 to *de novo* identify HSN active enhancers (Lloret-Fernández et al., 2018). Thus,  
524 a second function for this complex terminal differentiation programs might be  
525 providing enhancer selectivity.

526 To test this hypothesis we next asked if the dopaminergic regulatory program  
527 imposes a defining regulatory signature in dopaminergic expressed genes.  
528 Published single-cell RNA-seq data (Cao et al., 2017) was used to identify  
529 additional genes differentially expressed in dopaminergic neurons (**Figure 6 -**  
530 **Figure supplement 1**). We found 86 genes whose expression is enriched in  
531 dopaminergic neurons compared to other clusters of ciliated sensory neurons.  
532 As expected, this gene list includes all dopamine pathway genes and other  
533 known dopaminergic effector genes, but not pan-cilia expressed genes (**Data**  
534 **source 2**). In analogy to our previous analysis of the HSN regulatory genome  
535 (Lloret-Fernández et al., 2018), we analyzed the upstream and intronic  
536 sequences of these genes. For comparison purposes, we built ten thousand  
537 sets of 86 random genes with similar upstream and intronic length distribution to  
538 dopaminergic expressed genes.  
539 First, we focused our analysis only on the three already published dopaminergic  
540 terminal selectors (*ast-1/ETS*, *ceh-43/DLL HD* and *ceh-20/PBX HD*). We found

541 this regulatory signature (ETS+HD+PBX binding sites) lacks enough specificity  
542 as all genes (either dopaminergic expressed genes or random sets) contain  
543 DNA windows with matches for all three TFs (100% of dopaminergic expressed  
544 genes compared to 100% in random sets). Reducing DNA-window search  
545 length from 700 bp to 300 bp or 150 bp did not increase specificity (100% of  
546 dopaminergic expressed genes compared to 100% in random sets). Next, we  
547 expanded our analysis to DNA regulatory windows containing at least one  
548 match for each of the eight position weight matrices associated to the  
549 dopaminergic TF terminal regulatory program (**Figure 6A**). We found that  
550 seventy-eight percent of dopaminergic expressed genes contain at least one  
551 associated dopaminergic regulatory signature window, a significantly higher  
552 percentage compared to the random sets of genes (mean random sets 60%,  
553  $p < 0.001$ ) (**Figure 6B**). Thus, dopaminergic signature is significantly enriched in  
554 dopaminergic-expressed genes. Next, we built similar sets of differentially  
555 expressed genes for five randomly picked non-dopaminergic neuron categories  
556 (RIA, ASE, Touch Receptor neurons, GABAergic neurons and ALN/PLN/SDQ  
557 cluster) (**Figure 6 - Figure supplement 1 and Data source 2**). We found that  
558 the percentage of genes containing the dopaminergic signature is smaller in  
559 non-dopaminergic neurons compared to dopaminergic neurons (**Figure 6B**).  
560 This difference is statistically significant for all neurons except the  
561 ALN/PLN/SDQ neuron cluster (**Figure 6B**). In addition, none of the non-  
562 dopaminergic neuronal types show a significant enrichment of the dopaminergic  
563 signature with respect to their respective background of ten thousand random  
564 sets of comparable genes (**Figure 6B**,  $p > 0.05$ ). The reason why ALN/PLN/SDQ  
565 expressed genes show a higher association to dopaminergic regulatory

566 signature compared to other non-dopaminergic neurons is uncertain. Terminal  
567 selectors for ALN/PLN/SDQ neurons are yet unknown, a similar combination of  
568 TF families controlling terminal differentiation of these neurons could explain the  
569 higher presence of the dopaminergic regulatory signature.

570 Importantly, dopaminergic expressed genes are specifically enriched for the  
571 dopaminergic regulatory signature, as the HSN regulatory signature, that is, the  
572 presence of TFBS for the six members of the HSN TF collective (Lloret-  
573 Fernández et al., 2018), is not enriched in dopaminergic expressed genes  
574 **(Figure 6 - Figure supplement 1)**.

575 Dopaminergic regulatory signature enrichment in dopaminergic expressed  
576 genes is even more pronounced when considering only the promoter sequence  
577 (1.5 Kb upstream of the ATG) **(Figure 6C)**. These data shows that proximal  
578 regulation has a major role in neuronal terminal differentiation in *C. elegans*.

579 The full complement of dopaminergic TFBS is required to provide specificity to  
580 the dopaminergic regulatory signature as regulatory windows containing only  
581 seven or six types of dopaminergic TF motifs are not preferentially found in  
582 dopaminergic expressed genes **(Figure 6 - Figure supplement 1)**.

583 Four out of the five dopamine pathway genes contain at least one associated  
584 dopaminergic regulatory signature window. Remarkably, predicted regulatory  
585 windows overlap with the previously isolated *cis*-regulatory modules **(Figure**  
586 **6D)** (Flames and Hobert, 2009).

587 Altogether, our data suggest that the dopaminergic TF collective acts through  
588 the dopaminergic regulatory signature to activate transcription of dopaminergic  
589 effector genes. However, the presence of the dopaminergic signature in some  
590 genes not expressed in dopaminergic neurons indicates the signature itself is

591 not sufficient to induce dopaminergic expression. Additional TFs, gene  
592 repression mechanisms, or chromatin accessibility could further regulate  
593 dopaminergic regulatory signature specificity. It is also possible that specific  
594 syntactic rules (TFBS order, distance and disposition) discriminate functional  
595 from non-functional dopaminergic regulatory signature windows.

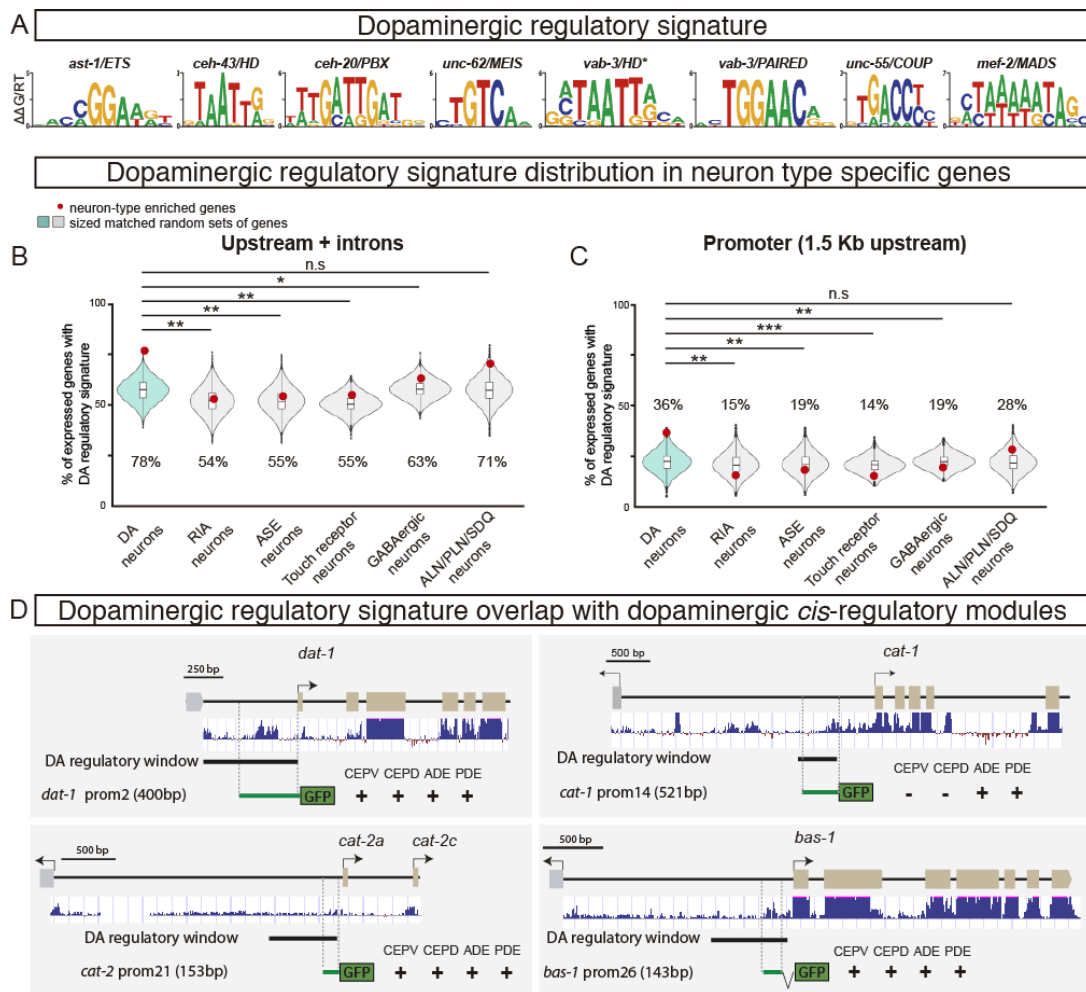

Figure 6

**Figure 6. The Dopaminergic Regulatory Signature is preferentially associated to dopaminergic expressed genes.**

596

**A)** Position weight matrix logos assigned to each member of the dopaminergic TFs. The dopaminergic regulatory signature is defined by the presence of at least one match to each PWM in less than 700bp DNA window.

**B)** Dopaminergic regulatory signature is more prevalent in the upstream and intronic sequences of the set of 86 genes enriched in dopaminergic neurons (red dot) compared to the distribution in 10,000 sets of random comparable genes (blue violin plot) ( $p < 0.001$ ). Analysis of five additional gene sets with non-dopaminergic expression (RIA, ASE, Touch receptor neurons, GABAergic neurons and ALN/PLN/SDQ) does not show enrichment compared to their random sets (red dots and grey violin plots) and show lower percentage of genes with dopaminergic regulatory signature. Brunner-Munzel test. \*:  $p < 0.05$ , \*\*:  $p < 0.01$ . See **Figure 6-S1** and **Data Source 2** for additional analysis of dopaminergic regulatory signature distribution and gene lists. Expression data obtained from (Cao et al., 2017).

**C)** Dopaminergic regulatory signature in promoter regions (1.5 Kb upstream ATG) is also enriched in dopaminergic expressed genes compared to random sets or to other non-dopaminergic expressed genes, suggesting proximal regulation has a major role in dopaminergic terminal differentiation.

**D)** Predicted dopaminergic regulatory signature windows overlap with the experimentally isolated minimal enhancers for four out of the five dopamine pathway genes (Flames and Hobert, 2009). Black lines represent the coordinates covered by bioinformatically predicted dopaminergic regulatory signature windows. Green lines mark published minimal enhancers for the respective gene. Dark blue bar profiles represent sequence conservation in *C. briggsae*, *C. brenneri*, *C. remanei* and *C. japonica*. Dopaminergic regulatory signature does not necessarily coincide with conserved regions.

597 **Additional parallel gene routines expressed in the dopaminergic neurons**  
598 **do not show enrichment in dopaminergic regulatory signature**

599 Next, we examined the distribution of the dopaminergic regulatory signature  
600 across the entire *C. elegans* genome. We found it is preferentially present in  
601 putative regulatory sequences of neuronally expressed genes compared to the  
602 rest of the genome (**Figure 7A** and **Data source 2**). This enrichment is also  
603 present when analyzing only promoter sequences (**Figure 7A**).

604 Gene ontology analysis of all genes in the *C. elegans* genome with  
605 dopaminergic regulatory signature revealed enrichment of many neuronal  
606 processes related to dopaminergic differentiation and function, including  
607 learning, memory, response to stimuli or dopamine metabolism (**Figure 7B**).  
608 Similar gene ontology categories are enriched when only genes with  
609 dopaminergic regulatory signature present in their promoters are considered  
610 (**Figure 7B**).

611 Different hierarchies of gene expression co-exist in any given cell,  
612 mechanosensory dopaminergic neurons co-express at least four types of  
613 genes: 1) Dopaminergic effector genes such as dopaminergic pathway genes,  
614 neuropeptides, neurotransmitter receptors, etc., that are preferentially  
615 expressed by this neuron type; 2) Genes coding for structural components of  
616 cilia which are expressed by all sixty ciliated sensory neurons in *C. elegans*; 3)  
617 Panneuronal genes, such as components of the synaptic machinery or  
618 cytoskeleton, expressed by all 302 neurons in *C. elegans* hermaphrodite and;  
619 4) Ubiquitous genes expressed by all cells of the organism, such as ribosomal  
620 or heat shock proteins (**Figure 7C**). Thus, we next studied the distribution of the  
621 dopaminergic regulatory signature in these parallel gene categories.

622 We find that the percentage of genes with dopaminergic signature is higher for  
623 dopaminergic enriched effector genes compared to other parallel routines in the  
624 cell (**Figure 7C**). This difference is also present when only promoter sequences  
625 are analyzed (**Figure 7C**). Of note, although lower than dopaminergic effector  
626 genes, panneuronal genes also show increased presence of dopaminergic  
627 regulatory signature compared to other regulatory routines of the cell (**Figure**  
628 **7C**) suggesting dopaminergic TFs could partially contribute to panneuronal  
629 gene control, consistent with previous reports on panneuronal gene regulation  
630 (Stefanakis et al., 2015). Interestingly, dopaminergic regulatory signature  
631 associated to panneuronal genes seems to be mostly located outside promoter  
632 regions (>1.5 Kb from ATG), which is different to dopamine effector genes. The  
633 frequency of dopaminergic regulatory signature in panciliated and ubiquitous  
634 genes is similar to genes not expressed in neurons. Thus, our data suggest that  
635 the main function for the dopaminergic TF collective is the regulation of neuron-  
636 type specific gene expression.



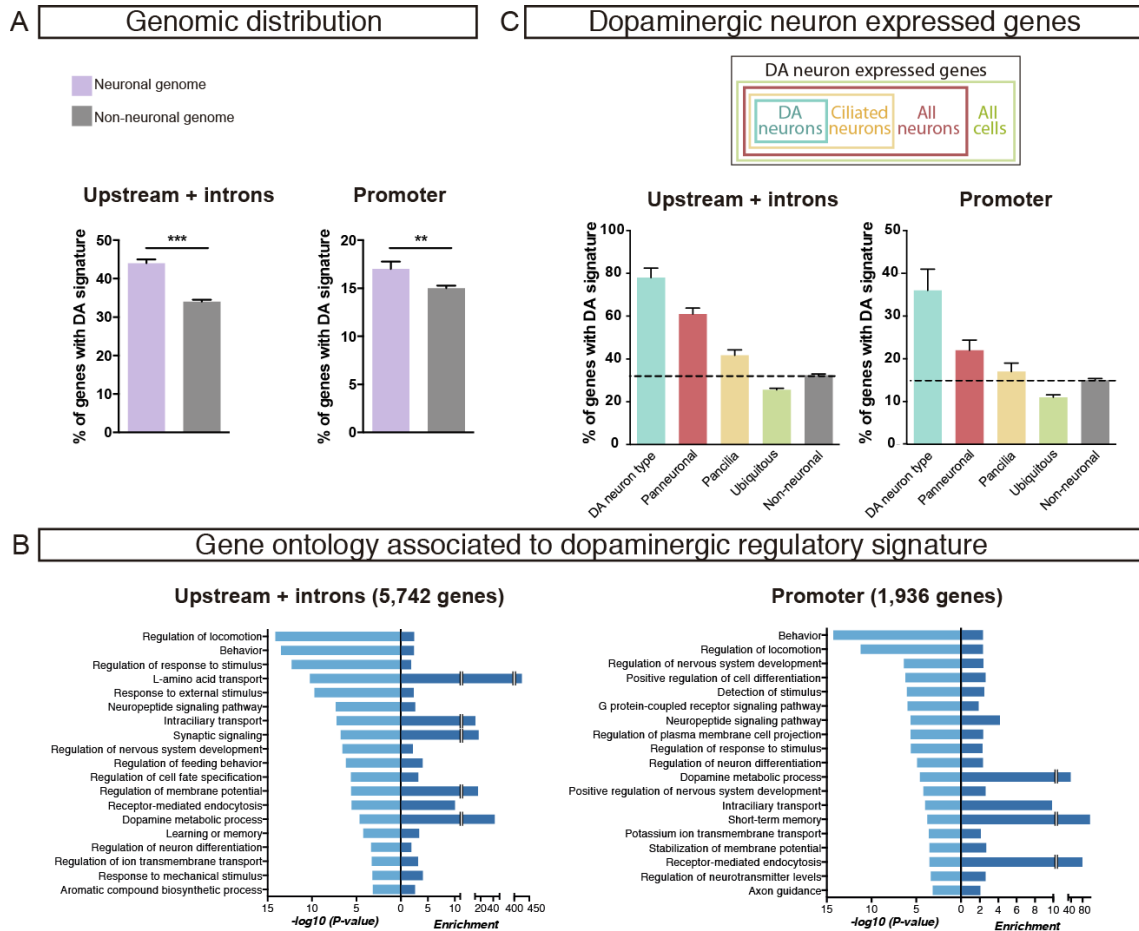

Figure 7

**Figure 7. Dopaminergic regulatory signature is enriched in dopaminergic effector genes but not in other parallel regulatory routines of the cell.**

**A)** Genomic search of the dopaminergic regulatory signature reveals enrichment in neuronal expressed genes compared to genes expressed in non-neuronal tissues. Enrichment is maintained when only promoter sequences are analyzed. Chi-squared with Yates correction test. \*\*\*:  $p < 0.001$ , \*\*:  $p < 0.01$ . Expression data for neuronal and non-neuronal tissues obtained from Packer et al., 2019. See also **Data Source 2**.

**B)** Gene ontology analysis of genes with associated dopaminergic regulatory signature. p-values and enrichment of genes with dopaminergic signature in the corresponding GO category are represented.

**C)** Parallel gene expression routines coexist in the dopaminergic neurons: 1) Dopaminergic effector genes mostly specific of dopaminergic neurons; 2) Pancilia genes expressed by all sensory ciliated neurons; 3) Panneuronal genes expressed by all neurons and 4) Ubiquitous genes expressed by all cells. Dopaminergic regulatory signature is enriched in dopaminergic effector genes and to a less extent in distal regions of panneuronal genes but it is not present in other parallel routines of dopaminergic neurons. Quantification of dopaminergic signature in non-neuronal genes is shown as negative control and marked with a dashed line. Expression data for pancilia, panneuronal, ubiquitous genes are obtained from Packer et al., 2019.

638 **DISCUSSION**

639 **Neuron-type specification is mainly controlled by five transcription factor**  
640 **families**

641 Focusing on the MA superclass of neurons we provide a comprehensive view of  
642 the TFs required at any developmental step in the specification of ten different  
643 neuronal types. We did not find any global regulator of MA fate, which is likely  
644 due to the molecular and functional diversity found in this superclass of  
645 neurons. Each neuron type is regulated by different sets of TFs, however, we  
646 uncovered general rules shared by all MA neuron types that might also apply to  
647 non-MA neurons. First, we identified at least 10 different TFs required in the  
648 specification of each neuron type (with the exception of the NSM neuron, which  
649 might be particularly unresponsive to RNAi), evidencing that complex gene  
650 regulatory networks underlie neuron type specification. Second, in spite of this  
651 TF diversity, most TFs involved in the specification of all MA neurons  
652 consistently belong to only five out of the more than fifty *C. elegans* TF families:  
653 HD, bHLH, ZF, bZIP and non-nematode-specific members of the NHR family.  
654 Importantly, analysis of genetic mutants displaying neuronal phenotypes  
655 reveals the same TF family distribution, which does not only validate results  
656 obtained from the RNAi screen but also expands these findings to other  
657 neuronal types.

658 As other fundamental processes in biology, basic principles of neuron  
659 specification are expected to be deeply evolutionary conserved. Of note, a  
660 recent unbiased CRISPR screen in mouse embryonic stem cells identified 64  
661 TFs that are able to induce neuronal phenotypes (Liu et al., 2018). Eighty  
662 percent of these factors also belong to the same five transcription factor families

663 identified in our study. The ancestral role of bHLH TFs as proneural factors has  
664 been established in a wide range of metazoans including vertebrates,  
665 *Drosophila*, *C. elegans* and the cnidaria *Nematostella vectensis* which has one  
666 of the most simple nervous systems (Guillemot and Hassan, 2017; Layden et  
667 al., 2012; Lloret-Fernández et al., 2018; Poole et al., 2011). HD TFs are  
668 involved in many developmental processes and their role in neuron terminal  
669 differentiation is also conserved in different animal groups including cnidaria  
670 (Babonis and Martindale, 2017; Briscoe et al., 2000; Hobert, 2016; Shirasaki  
671 and Pfaff, 2002; Thor et al., 1999; Tournière et al., 2020). Several NHRs, bZIP  
672 and ZF TFs are known to regulate neuron-type specification in mammals, such  
673 as Coup1, Nurr1, Tlx and Nr2e3 NHR TFs (Bovetti et al., 2013; Haider et al.,  
674 2000; Roy et al., 2004; Zetterström et al., 1997), Nrl, cMaf and Mafb bZIP TFs  
675 (Blanchi et al., 2003; Mears et al., 2001; Wende et al., 2012) or Myt1l, Gli1,  
676 Sp8, Ctip2, Fezf1/2 ZF TFs (Arlotta et al., 2005; Hynes et al., 1997; Mall et al.,  
677 2017; Shimizu et al., 2010; Waclaw et al., 2006). However, in contrast to bHLH  
678 and HD, a general role in neuron specification for these families has been  
679 poorly studied in any model organism. Functional characterization of the NHR,  
680 bZIP and ZF TF candidates retrieved from our RNAi screen will help better  
681 understand the role of these TF families in neuron specification.

682 In addition to the results obtained from our TF RNAi screen, the complete and  
683 fully sequence-verified TF RNAi library is a new valuable resource for the  
684 community that could be used for the identification of gene regulatory networks  
685 involved in many different biological processes.

686

687 **Complexity of terminal differentiation programs provide genetic**  
688 **robustness and enhancer selectivity**

689 Here we have identified seven TFs from different TF families that work together  
690 in the direct activation of dopaminergic effector gene expression. We find this  
691 TF complexity has at least two functional consequences: it provides genetic  
692 robustness and enhancer selectivity.

693 Compensatory actions among TFs have been mostly described for paralogous  
694 genes, however, we find non-paralogous TFs act redundantly in the regulation  
695 of terminal gene expression. A few other examples of non-paralogous TF  
696 compensation are also found in embryogenesis, larval development or muscle  
697 specification (Baugh et al., 2005; Kuntz et al., 2012; Walton et al., 2015). We  
698 find compensatory effects are very unique: they not only depend on individual  
699 TF pairs (i.e. not all double mutant combinations are synergistic), but also are  
700 specific for each analyzed reporter (i.e. synergistic TFs show synergy for one  
701 reporter but not for others) and in each case, are limited to particular  
702 dopaminergic neuron types (i.e. synergies affect one or more dopaminergic  
703 neuron types but not others). These specific synergies might be the reflection of  
704 flexible protein-protein interactions among TFs that will be modulated by the  
705 specific TF binding sites dispositions in each enhancer and are consistent with  
706 the model of TF collectives for enhancer functions (Spitz and Furlong, 2012).  
707 Synergistic effects among terminal selectors have been previously reported in  
708 other neuronal types, such as HSN and NSM serotonergic neurons or  
709 glutamatergic neurons (Lloret-Fernández et al., 2018; Serrano-Saiz et al., 2013;  
710 F. Zhang et al., 2014), suggesting it might be a general feature of neuron-type  
711 terminal regulatory programs.

712 In addition, we find TF complexity might also be important for enhancer  
713 selectivity. The sequence determinants that differentiate active regulatory  
714 regions from other non-coding regions of the genome are currently largely  
715 unknown. Interestingly, one of the best sequence predictors of active enhancers  
716 is the number of putative TF binding sites for different TFs found in a region  
717 (Grossman et al., 2017; Kheradpour et al., 2013; Tewhey et al., 2016). We find  
718 binding site clusters of the dopaminergic TFs are preferentially located in  
719 putative regulatory regions of dopaminergic expressed genes compared to  
720 other genes. Thus TF complexity of neuronal terminal regulatory programs  
721 might not only provide genetic robustness but also facilitate enhancer selection.

722

### 723 **Parallel gene regulatory routines co-exist in the cell**

724 The active transcriptome of a mature neuron can be divided in different gene  
725 categories depending on specificity of expression, ranging from cell-type  
726 specific genes to ubiquitous gene expression. While it is well established that  
727 terminal selectors have a direct role in neuron-type-specific gene expression,  
728 their role in other gene categories is less clear (Hobert, 2016). In our study we  
729 find the dopaminergic regulatory signature is predominantly enriched in  
730 dopamine effector genes, supporting a restricted role for terminal selectors in  
731 the regulation of neuron-type effector genes. Dopaminergic regulatory signature  
732 is also associated, to a less extent, to the distal regulatory regions of  
733 panneuronal genes, which is consistent with the known minor contributions for  
734 some terminal selectors in panneuronal gene expression (Stefanakis et al.,  
735 2015). In contrast, pancellia genes and ubiquitous genes are mostly devoid of  
736 dopaminergic regulatory signature, suggesting that other TFs activate these

737 gene categories. Transcriptional regulation of ubiquitous gene has been poorly  
738 studied. Broadly expressed TFs, such as Sp1, GABP/ETS and YY1 seem to  
739 play a role in ubiquitous gene expression in mammals (Bellora et al., 2007;  
740 Farré et al., 2007). Cilia structural genes are directly regulated by *daf-19*/RFX  
741 TF (Swoboda et al., 2000), and this role is conserved in vertebrates (Choksi et  
742 al., 2014). However, *daf-19* is expressed in all neurons, thus additional  
743 unknown TFs must control cilia gene expression. Intriguingly, some terminal  
744 selector mutants display morphological cilia defects detected by failure to stain  
745 with the lipophilic dye Dil (Hobert, 2016). Although to date direct ciliome targets  
746 have not been identified for any terminal selector, it is conceivable that  
747 individual TF members of terminal differentiation program, but not the whole TF  
748 collective, might participate together with *daf-19* in the transcriptional regulation  
749 of some ciliome genes in specific neuron types. This could explain why some  
750 terminal selector mutants show cilia defects but pancilia genes are not enriched  
751 for the dopaminergic regulatory signature. In summary, and consistent with  
752 previous reports based on the analysis of a limited number of genes (Stefanakis  
753 et al., 2015), terminal selector collectives seem mostly devoted to neuron-type  
754 specific gene expression and to a less extend to panneuronal genes.

755

### 756 **Neuron type evolution and deep homology**

757 Mouse TF orthologs of the *C. elegans* dopaminergic terminal regulatory  
758 program are also required for olfactory bulb dopaminergic terminal specification,  
759 which is the most ancestral dopaminergic population of the mammalian brain  
760 (Agoston et al., 2014; Bovetti et al., 2013; Brill et al., 2008; Flames and Hobert,  
761 2009; Qiu et al., 1995; Remesal et al., 2020). Here we find mouse TFs can, in

762 most cases, functionally substitute their worm orthologs suggesting both  
763 neuronal populations share deep homology, which refers to the relationship  
764 between cells in distant species that share their genetic regulatory programs  
765 (Shubin et al., 2009). Similar conservation of terminal regulatory programs is  
766 found for other neurons in *C. elegans* (Kratsios et al., 2012; Lloret-Fernández et  
767 al., 2018).

768 Identification of deep homology is an emerging strategy in evolutionary biology  
769 used to assign homologous neuronal types in distant species (Arendt, 2008;  
770 Arendt et al., 2019, 2016). The study of neuronal regulatory programs in  
771 different animal groups and the description of homologous relationships will  
772 help us better understand the origin of neurons and the nervous system  
773 evolution.

774 **METHODS**

775 ***C. elegans* Strains and Genetics**

776 *C. elegans* culture and genetics were performed as described (Brenner, 1974).

777 Strains used in this study are listed in Data Source 3.

778

779 **Generation of the Transcription factor RNAi library**

780 To generate the complete TF RNAi library we used *C. elegans* TF list from  
781 (Narasimhan et al., 2015). TF RNAi library was generated selecting RNAi  
782 bacterial clones targeting TFs from Dr. Ahringer library (BioScience) (Kamath et  
783 al., 2003). All clones were verified by Sanger sequencing, incorrect or missing  
784 clones were selected from Dr. Vidal library (BioScience) (Rual et al., 2004) and  
785 verified by Sanger sequencing. Remaining missing TF clones were generated  
786 from genomic N2 DNA by PCR amplification of the target gene, subcloning into  
787 L4440 plasmid (pPD129.36, Addgene) and transformed into *E. coli* HT115  
788 (ED3) strain (from CGC). Sanger sequencing was used to verify all clones. The  
789 complete list of TF RNAi feeding clones is listed in Data Source 1.

790

791 **RNAi feeding experiments**

792 RNAi feeding experiments were performed following standard protocols  
793 (Kamath et al., 2001). Briefly, Isopropyl  $\beta$ -D-1-thiogalactopyranoside (IPTG)  
794 was added at 6mM to NGM medium to prepare RNAi plates. RNAi clones were  
795 cultured overnight and induced with IPTG (4mM) three hours before seeding.  
796 Adult gravid hermaphrodites were transferred to each different seeded IPTG  
797 plates within a drop of alkaline hypochlorite solution. After overnight incubation  
798 at 20°C, 10-15 newly hatched larvae were picked into a fresh IPTG plates



799 seeded with the same RNAi clone and considered the parental generation (P0).  
800 Approximately 7 days later young adult F1 generation was scored. Lethal RNAi  
801 clones, that precluded F1 analysis, were scored at P0 as young adults. A  
802 minimum of 30 worms per clone, coming from three distinct plates were scored.  
803 All experiments were performed at 20°C. Each clone was scored in two  
804 independent replicates, a third replicate was performed when results from the  
805 first and second replicates did not coincide. In all scorings we include L4440  
806 empty clone as negative control and *gfp* RNAi clone as positive control.

807

### 808 **Mutant strains and genotyping**

809 Strains used in this study are listed in Data Source 3. Deletion alleles were  
810 genotyped by PCR. Point mutations were genotyped by sequencing.  
811 Genotyping primers are included in Data Source 4. Alleles *vab-3(ot346)*, *unc-*  
812 *62(e644)* and *lag-1(q385)* were determined by visual mutant phenotype. The  
813 mutation *unc-62(mu232)* was followed through its link with the fluorescent  
814 reporter *muls35*.

815

### 816 **Generation of *C. elegans* transgenic lines**

817 Gene constructs for *cis*-regulatory analysis were generated by cloning into the  
818 pPD95.75 vector. For identification of the putative binding sites the following  
819 consensus sequences were used: GACA for UNC-62/MEIS HD (Campbell and  
820 Walthall, 2016); GRAGBA for VAB-3/PAIRED HD (Holst et al., 1997; Kim et al.,  
821 2008); TGACCW for UNC-55/COUP-TF (Badis et al., 2009) and  
822 CTAWWWWTAG for MEF-2/MADS (Boyle et al., 2014). Directed mutagenesis  
823 was performed by Quickchange II XL site-directed mutagenesis kit

824 (Stratagene). For microinjections the plasmid of interest (50 ng/μl) was injected  
825 together with *rol-6* comarker pRF4 [*rol-6(su1006)*, 100 ng/μl]. *unc-55*  
826 transcriptional reporter was generated cloning 4kb upstream the ATG of the  
827 gene into ppD95.75 and injected at 50 ng/μl concentration together with *rol-*  
828 *6(su1006)* co-marker (100 ng/μl). *vab-3::gfp* fosmid injection DNA mix  
829 contained fosmid (40 ng/μl) and two comarkers, pRF4 (50 ng/μl) and pNF101  
830 (*ttx-3prom::mcherry*) (50 ng/μl). For rescue experiments, commercially available  
831 cDNA of the TF candidates was obtained from Dharmacon Inc and Invitrogen.  
832 cDNAs corresponding to the entire coding sequence of *unc-62*, *vab-3*, *unc-55*,  
833 *mef-2*, *Meis2*, *Pax6*, *Nr2f1* and *Mef2a* were amplified by PCR and cloned into  
834 *dat-1* and *bas-1* promoter reporter plasmids replacing GFP cDNA (See primers  
835 in **Data Source 4**). cDNA plasmid (25 ng/μl) was injected directly into the  
836 corresponding mutant background as complex arrays together with digested *E.*  
837 *coli* genomic DNA (50 ng/μl) and *unc-122::rfp* (25 ng/μl) fluorescent co-marker  
838 (**Data Source 3**).

839

#### 840 **Scoring and statistics**

841 Scoring and micrographs were performed using 40X objective in a Zeiss  
842 Axioplan 2 microscope. For RNAi screening experiments and *cis*-analysis, 30  
843 young adult animals per line or per RNAi clone and replicate were analyzed;  
844 For mutants analysis 50 individuals were scored. RNAi experiments were  
845 performed at 20°C while *cis*-regulatory and mutant analyses were performed at  
846 25°C. Fisher exact test, two tailed was used for statistical analysis.  
847 For mutant analysis lack of GFP signalling was considered OFF, if GFP  
848 expression was substantially weaker than WT, 'FAINT' category was included.

849 For *cis*-regulatory analysis two or three independent lines for each transgenic  
850 construct were analyzed. Mean expression value of three wild type lines is  
851 considered the reference value and mutated constructs are considered to show  
852 normal expression when GFP expression was 100-70% of average expression  
853 of the corresponding wild type construct ("+" phenotype). 70-30% reduction  
854 compared to wild type reference value was considered a partial phenotype "+/-".  
855 GFP expression below 30% was considered as great loss of expression ("-"  
856 phenotype) and if no GFP was detected (less than 5% of the neurons) was  
857 assigned as total loss of GFP ("--" phenotype).

858 For transcription factor expression analysis, reporter lines were crossed into  
859 *otIs181 (dat-1::mcherry, ttx-3::mcherry)* (See **Data Source 3** for strain list).  
860 Images were taken with confocal TCS-SP8 Leica microscope and processed  
861 with ImageJ 1.50i software.

862 For cross regulation experiments, the expression of *unc-62*, *vab-3* and *mef-2*  
863 reporters were scored in 10 L1 larvae, in wild type and *ast-1(hd92)* background.  
864 Z stack pictures (Zeiss microscope) of all the length of the animal were taken  
865 keeping the same distance between z-planes. Images were analyzed with  
866 ImageJ software to score cells in the head of the animals co-expressing *ift-20*  
867 reporter with each TF.

868

## 869 **Bioinformatic Analysis**

870 Unless otherwise indicated, all the analyses were performed using the software  
871 R (Z. Zhang et al., 2014) and packages from Bioconductor (Huber et al., 2015).  
872 Single-cell (sc) RNA-seq data from (Cao et al., 2017) was downloaded from the  
873 author's website (<http://atlas.gs.washington.edu/worm-rna/>). These data

874 correspond to nearly 50,000 cells coming from *Caenorhabditis elegans* at the  
875 L2 larval stage. Cells with failed QC, doublets and unclassified cells were  
876 filtered and excluded from subsequent analysis. Differential expression analysis  
877 between dopaminergic neurons cluster and clusters for the other ciliated  
878 sensory neurons was performed using Monocle (Qiu et al., 2017b, 2017a;  
879 Trapnell et al., 2014) and results were filtered by q-value ( $\leq 0.05$ ) in order to get  
880 a list of differentially expressed genes in dopaminergic neurons. For gene  
881 enrichment of neuronal clusters corresponding to non-dopaminergic neurons  
882 (RIA, ASE, Touch receptor neurons, GABAergic neurons and ALN/PLN/SDQ  
883 neurons) we followed a similar strategy and performed differential expression  
884 tests between each neuronal cluster and all cells from the dataset annotated as  
885 neurons (**Data Source 2**). Specificity of these six gene sets was checked by the  
886 enrichment of its anatomical association in *C. elegans* using the web tool  
887 WormEnrichr (<https://amp.pharm.mssm.edu/WormEnrichr/>) (Chen et al., 2013).  
888 Gene lists for neuronal, non-neuronal, ubiquitous, panneuronal and panciliated  
889 categories were inferred from a more comprehensive sc-RNA-seq dataset  
890 (Packer et al., 2019). We retrieved gene expression data (log<sub>2</sub> transcripts per  
891 million) from all the genes that were expressed in at least one annotated  
892 terminal cell bin, getting a final matrix of 15,813 genes x 409 terminal cell bins.  
893 Following authors' original approach, genes were ordered by hierarchical  
894 clustering and cell bins were ordered by tissues; resulting in differential gene  
895 clusters which marked sites of predominant expression [Figure S32 from  
896 (Packer et al., 2019)]. Using these data, we manually curated 21 gene lists,  
897 which were classified into five categories: non-neuronal tissue-specific,  
898 ubiquitous, panneuronal, panciliated, and neuron-type specific expression (**Data**

899 **Source 2**). For genes located in operons, only the gene located at the 5' end of  
900 the cluster, and thus subdued to *cis*-regulation, were considered for  
901 dopaminergic regulatory signature analysis. For hybrid operons, additional  
902 promoters were also included (Blumenthal, Davis & Garrido-Lecca, 2015). For  
903 genomic search of dopaminergic regulatory signature similar exclusion of  
904 downstream genes from operon was performed, removing a total of 2,083  
905 genes from the analysis. The final curated gene lists used in this study are  
906 listed in **Data Source 2**.

907 For *C. elegans* regulatory signature analysis, we downloaded PWMs from Cis-  
908 BP version 1.02 (Weirauch et al., 2014) corresponding to the TF binding sites of  
909 the seven transcription factors that compose the dopaminergic regulatory  
910 signature in *C. elegans*. If the exact match for *C. elegans* was not available, we  
911 selected the PWM from the *M. musculus* or *H. sapiens* orthologous TF  
912 (COUPTF, ref. M1457; HD, ref. M5340; ETS, ref. M0709; MADS, ref. M6342;  
913 MEIS, ref. M6048; PAIRED, ref. M1500; PBX, ref. M1898), plus an additional  
914 hybrid PAIRED HD site (represented as HD\*, ref. M6189). Following published  
915 methodology (Lloret-Fernández et al., 2018) we downloaded upstream and  
916 intronic gene regions of protein-coding genes from WormBase version 262 and  
917 then classified genes using the gene lists mentioned above. Upstream regions  
918 were trimmed to a maximum of 10 kb. PWMs were aligned to genomic  
919 sequences and we retrieved matches with a minimum score of 70%. To  
920 increase specificity, we removed all matches that did not bear an exact  
921 consensus sequence for the corresponding TF family (consensus sequence for  
922 COUPTF: TGACC, HD: TAATT, ETS: VMGGAWR, MADS: WWWDTAG, MEIS:  
923 DTGTCD, PAIRED: GGARSA, HD\*: HTAATTR, PBX: GATNNAT). Sliding

924 window search with a maximum length of 700 bp was performed to find regions  
925 that included at least one match for 6 or more of the 8 different TF binding  
926 motifs, allowing flexible motif composition. Resulting windows were classified  
927 according to the number of different motifs that they bore (6 or more, 7 or more  
928 or 8). To assess signature enrichment in the set of dopaminergic expressed  
929 genes 10,000 sets of 86 genes random genes were built considering that 1)  
930 they were not differentially expressed in dopaminergic neurons, 2) at least one  
931 ortholog had been described in other *Caenorhabditis* species (*C. brenneri*, *C.*  
932 *briggsae*, *C. japonica* or *C. remanei*), and 3) their upstream and intronic regions  
933 were similar in length, on average, to those of the 86 dopamine-expressed  
934 genes (Mann-Whitney U test, p-value > 0.05). For each one of the non-  
935 dopaminergic neuronal groups (RIA, ASE, Touch receptor neurons, GABAergic  
936 neurons and ALN/PLN/SDQ neurons), similar sets of random genes were built.  
937 We considered the enrichment in signature to be significant when the percentile  
938 of the neuronal group in regard to the internal random control was above 95.  
939 Differences between dopaminergic expressed genes and other neuronal groups  
940 were assessed by Brunner-Munzel test performed with R package  
941 brunnermunzel (Toshiaki, 2019), \*: p-value < 0.05, \*\*: p-value < 0.01, \*\*\*: p-  
942 value < 0.001).

943 Gene ontology analysis of the genes assigned dopaminergic regulatory  
944 signature were carried out using the web tool GOrilla ([http://cbl-](http://cbl-gorilla.cs.technion.ac.il/)  
945 [gorilla.cs.technion.ac.il/](http://cbl-gorilla.cs.technion.ac.il/)) (Eden et al., 2009), using *C. elegans* coding genome  
946 as control list.

947

948

949 **Author Contributions**

950 A.J., N.D., M.M., R.B., conducted the experiments, E.S. performed the  
951 bioinformatics analysis, N.F. designed the experiments and wrote the paper.

952 **Acknowledgments**

953 We thank CGC (P40 OD010440) for providing strains. Elia García and  
954 Francisco Anguix for technical help. Ana Pilar Gómez-Escribano and Carla  
955 Lloret-Fernández for helping in the generation of the RNAi library.  
956 Bioinformatics and Biostatistics Unit from Principe Felipe Research Center  
957 (CIPF) for providing access to the cluster, co-funded by European Regional  
958 Development Funds (FEDER). Dr Guillermo Ayala for advice on statistical  
959 analysis. Dr Oscar Marín, Dr Beatriz Rico and Dr Luisa Cochella labs for  
960 scientific discussion. Dr Oscar Marín, Dr Luisa Cochella, Dr Inés Carrera, Dr  
961 Roger Pocock, Dr Arantza Barrios and Dr Oliver Hobert for comments on the  
962 manuscript.

- 963 **REFERENCES**  
964  
965 Agoston Z, Heine P, Brill MS, Grebbin BM, Hau AC, Kallenborn-Gerhardt W,  
966 Schramm J, Götz M, Schulte D. 2014. Meis2 is a Pax6 co-factor in  
967 neurogenesis and dopaminergic periglomerular fate specification in the  
968 adult olfactory bulb. *Dev.* doi:10.1242/dev.097295  
969 Andrews MG, Kong J, Novitch BG, Butler SJ. 2019. New perspectives on the  
970 mechanisms establishing the dorsal-ventral axis of the spinal cord *Current*  
971 *Topics in Developmental Biology.* doi:10.1016/bs.ctdb.2018.12.010  
972 Angerer LM, Yaguchi S, Angerer RC, Burke RD. 2011. The evolution of nervous  
973 system patterning: Insights from sea urchin development. *Development.*  
974 doi:10.1242/dev.058172  
975 Arlotta P, Molyneaux BJ, Chen J, Inoue J, Kominami R, MackKlis JD. 2005.  
976 Neuronal subtype-specific genes that control corticospinal motor neuron  
977 development in vivo. *Neuron* **45**:207–221.  
978 doi:10.1016/j.neuron.2004.12.036  
979 Babonis LS, Martindale MQ. 2017. PaxA, but not PaxC, is required for  
980 cnidocyte development in the sea anemone *Nematostella vectensis.*  
981 *Evodevo* **8**:1–20. doi:10.1186/s13227-017-0077-7  
982 Badis G, Berger MF, Philippakis AA, Talukder S, Gehrke AR, Jaeger SA, Chan  
983 ET, Metzler G, Vedenko A, Chen X, Kuznetsov H, Wang CF, Coburn D,  
984 Newburger DE, Morris Q, Hughes TR, Bulyk ML. 2009. Diversity and  
985 complexity in DNA recognition by transcription factors. *Science (80- ).*  
986 doi:10.1126/science.1162327  
987 Baugh LR, Wen JC, Hill AA, Slonim DK, Brown EL, Hunter CP. 2005. Synthetic  
988 lethal analysis of *Caenorhabditis elegans* posterior embryonic patterning  
989 genes identifies conserved genetic interactions. *Genome Biol* **6**.  
990 doi:10.1186/gb-2005-6-5-r45  
991 Bellora N, Farré D, Mar MM. 2007. Positional bias of general and tissue-specific  
992 regulatory motifs in mouse gene promoters. *BMC Genomics* **8**:1–13.  
993 doi:10.1186/1471-2164-8-459  
994 Bertrand N, Castro DS, Guillemot F. 2002. Proneural genes and the  
995 specification of neural cell types. *Nat Rev Neurosci.* doi:10.1038/nrn874  
996 Blanchi B, Kelly LM, Viemari JC, Lafon I, Burnet H, Bévengut M, Tillmanns S,  
997 Daniel L, Graf T, Hilaire G, Sieweke MH. 2003. MafB deficiency causes  
998 defective respiratory rhythmogenesis and fatal central apnea at birth. *Nat*  
999 *Neurosci* **6**:1091–1099. doi:10.1038/nn1129  
1000 Borello U, Pierani A. 2010. Patterning the cerebral cortex: Traveling with  
1001 morphogens. *Curr Opin Genet Dev.* doi:10.1016/j.gde.2010.05.003  
1002 Bovetti S, Bonzano S, Garzotto D, Giannelli SG, Iannielli A, Armentano M,  
1003 Studer M, De Marchis S. 2013. COUP-TFI controls activity-dependent  
1004 tyrosine hydroxylase expression in adult dopaminergic olfactory bulb  
1005 interneurons. *Dev.* doi:10.1242/dev.089961  
1006 Boyle AP, Araya CL, Brdlik C, Cayting P, Cheng C, Cheng Y, Gardner K, Hillier  
1007 LW, Jannette J, Jiang L, Kasper D, Kawli T, Kheradpour P, Kundaje A, Li JJ,  
1008 Ma L, Niu W, Rehm EJ, Rozowsky J, Slattery M, Spokony R, Terrell R,  
1009 Vafeados D, Wang D, Weisdepp P, Wu YC, Xie D, Yan KK, Feingold EA,  
1010 Good PJ, Pazin MJ, Huang H, Bickel PJ, Brenner SE, Reinke V, Waterston  
1011 RH, Gerstein M, White KP, Kellis M, Snyder M. 2014. Comparative analysis  
1012 of regulatory information and circuits across distant species. *Nature.*



- 1013 doi:10.1038/nature13668
- 1014 Brandt JP, Rossillo M, Du Z, Ichikawa D, Barnes K, Chen A, Noyes M, Bao Z,  
1015 Ringstad N. 2019. Lineage context switches the function of a *C. elegans*  
1016 Pax6 homolog in determining a neuronal fate. *Dev.*  
1017 doi:10.1242/dev.168153
- 1018 Brenner S. 1974. The genetics of *Caenorhabditis elegans*. *Genetics*.
- 1019 Brill MS, Snappyan M, Wohlfrom H, Ninkovic J, Jawerka M, Mastick GS, Ashery-  
1020 Padan R, Saghatelian A, Berninger B, Götz M. 2008. A Dlx2- and Pax6-  
1021 dependent transcriptional code for periglomerular neuron specification in  
1022 the adult olfactory bulb. *J Neurosci.* doi:10.1523/JNEUROSCI.0700-  
1023 08.2008
- 1024 Briscoe J, Pierani A, Jessell TM, Ericson J. 2000. A homeodomain protein code  
1025 specifies progenitor cell identity and neuronal fate in the ventral neural  
1026 tube. *Cell.* doi:10.1016/S0092-8674(00)80853-3
- 1027 Campbell RF, Walthall WW. 2016. Meis/UNC-62 isoform dependent regulation  
1028 of CoupTF-II/UNC-55 and GABAergic motor neuron subtype differentiation.  
1029 *Dev Biol.* doi:10.1016/j.ydbio.2016.09.009
- 1030 Cao J, Packer JS, Ramani V, Cusanovich DA, Huynh C, Daza R, Qiu X, Lee C,  
1031 Furlan SN, Steemers FJ, Adey A, Waterston RH, Trapnell C, Shendure J.  
1032 2017. Comprehensive single-cell transcriptional profiling of a multicellular  
1033 organism. *Science (80- )*. doi:10.1126/science.aam8940
- 1034 Cave JW, Akiba Y, Banerjee K, Bhosle S, Berlin R, Baker H. 2010. Differential  
1035 regulation of dopaminergic gene expression by Er81. *J Neurosci.*  
1036 doi:10.1523/JNEUROSCI.0419-10.2010
- 1037 Chen EY, Tan CM, Kou Y, Duan Q, Wang Z, Meirelles G V., Clark NR, Ma'ayan  
1038 A. 2013. Enrichr: Interactive and collaborative HTML5 gene list enrichment  
1039 analysis tool. *BMC Bioinformatics.* doi:10.1186/1471-2105-14-128
- 1040 Choksi SP, Lauter G, Swoboda P, Roy S. 2014. Switching on cilia:  
1041 Transcriptional networks regulating ciliogenesis. *Dev.*  
1042 doi:10.1242/dev.074666
- 1043 Doitsidou M, Flames N, Lee AC, Boyanov A, Hobert O. 2008. Automated  
1044 screening for mutants affecting dopaminergic-neuron specification in *C.*  
1045 *elegans*. *Nat Methods.* doi:10.1038/nmeth.1250
- 1046 Doitsidou M, Flames N, Topalidou I, Abe N, Felton T, Remesal L,  
1047 Popovitchenko T, Mann R, Chalfie M, Hobert O. 2013. A combinatorial  
1048 regulatory signature controls terminal differentiation of the dopaminergic  
1049 nervous system in *C. elegans*. *Genes Dev.* doi:10.1101/gad.217224.113
- 1050 Eden E, Navon R, Steinfeld I, Lipson D, Yakhini Z. 2009. GOrilla: A tool for  
1051 discovery and visualization of enriched GO terms in ranked gene lists.  
1052 *BMC Bioinformatics.* doi:10.1186/1471-2105-10-48
- 1053 El-Brolosy MA, Kontarakis Z, Rossi A, Kuenne C, Günther S, Fukuda N, Kikhi  
1054 K, Boezio GLM, Takacs CM, Lai SL, Fukuda R, Gerri C, Giraldez AJ,  
1055 Stainier DYR. 2019. Genetic compensation triggered by mutant mRNA  
1056 degradation. *Nature.* doi:10.1038/s41586-019-1064-z
- 1057 Farré D, Bellora N, Mularoni L, Messeguer X, Albà MM. 2007. Housekeeping  
1058 genes tend to show reduced upstream sequence conservation. *Genome*  
1059 *Biol* 8:1–10. doi:10.1186/gb-2007-8-7-r140
- 1060 Flames N, Hobert O. 2011. Transcriptional Control of the Terminal Fate of  
1061 Monoaminergic Neurons. *Annu Rev Neurosci.* doi:10.1146/annurev-neuro-  
1062 061010-113824

- 1063 Flames N, Hobert O. 2009. Gene regulatory logic of dopamine neuron  
1064 differentiation. *Nature*. doi:10.1038/nature07929
- 1065 Grossman SR, Zhang X, Wang L, Engreitz J, Melnikov A, Rogov P, Tewhey R,  
1066 Isakova A, Deplancke B, Bernstein BE, Mikkelsen TS, Lander ES. 2017.  
1067 Systematic dissection of genomic features determining transcription factor  
1068 binding and enhancer function. *Proc Natl Acad Sci U S A* **114**:E1291–  
1069 E1300. doi:10.1073/pnas.1621150114
- 1070 Guillemot F, Hassan BA. 2017. Beyond proneural: emerging functions and  
1071 regulations of proneural proteins. *Curr Opin Neurobiol*.  
1072 doi:10.1016/j.conb.2016.11.011
- 1073 Haider NB, Jacobson SG, Cideciyan A V., Swiderski R, Streb LM, Searby C,  
1074 Beck G, Hockey R, Hanna DB, Gorman S, Duhl D, Carmi R, Bennett J,  
1075 Weleber RG, Fishman GA, Wright AF, Stone EM, Sheffield VC. 2000.  
1076 Mutation of a nuclear receptor gene, NR2E3, causes enhanced S cone  
1077 syndrome, a disorder of retinal cell fate. *Nat Genet*. doi:10.1038/72777
- 1078 Hobert O. 2016. A map of terminal regulators of neuronal identity in  
1079 *Caenorhabditis elegans*. *Wiley Interdiscip Rev Dev Biol*.  
1080 doi:10.1002/wdev.233
- 1081 Hobert O. 2008. Regulatory logic of neuronal diversity: Terminal selector genes  
1082 and selector motifs. *Proc Natl Acad Sci U S A*.  
1083 doi:10.1073/pnas.0806070105
- 1084 Hobert O, Kratsios P. 2019. Neuronal identity control by terminal selectors in  
1085 worms, flies, and chordates. *Curr Opin Neurobiol*.  
1086 doi:10.1016/j.conb.2018.12.006
- 1087 Holst BD, Wang Y, Jones FS, Edelman GM. 1997. A binding site for Pax  
1088 proteins regulates expression of the gene for the neural cell adhesion  
1089 molecule in the embryonic spinal cord. *Proc Natl Acad Sci U S A*.  
1090 doi:10.1073/pnas.94.4.1465
- 1091 Huang X, Tian E, Xu Y, Zhang H. 2009. The *C. elegans* engrailed homolog ceh-  
1092 16 regulates the self-renewal expansion division of stem cell-like seam  
1093 cells. *Dev Biol*. doi:10.1016/j.ydbio.2009.07.005
- 1094 Huber W, Carey VJ, Gentleman R, Anders S, Carlson M, Carvalho BS, Bravo  
1095 HC, Davis S, Gatto L, Girke T, Gottardo R, Hahne F, Hansen KD, Irizarry  
1096 RA, Lawrence M, Love MI, Macdonald J, Obenchain V, Oleš AK, Pagès H,  
1097 Reyes A, Shannon P, Smyth GK, Tenenbaum D, Waldron L, Morgan M.  
1098 2015. Orchestrating high-throughput genomic analysis with Bioconductor.  
1099 *Nat Methods*. doi:10.1038/nmeth.3252
- 1100 Hynes M, Stone DM, Dowd M, Pitts-Meek S, Goddard A, Gurney A, Rosenthal  
1101 A. 1997. Control of cell pattern in the neural tube by the zinc finger  
1102 transcription factor and oncogene Gli-1. *Neuron* **19**:15–26.  
1103 doi:10.1016/S0896-6273(00)80344-X
- 1104 Jiang Y, Horner V, Liu J. 2005. The HMX homeodomain protein MLS-2  
1105 regulates cleavage orientation, cell proliferation and cell proliferation and  
1106 cell fate specification in the *C. elegans* postembryonic mesoderm.  
1107 *Development*. doi:10.1242/dev.01967
- 1108 Jiang Y, Shi H, Liu J. 2009. Two Hox cofactors, the Meis/Hth homolog UNC-62  
1109 and the Pbx/Exd homolog CEH-20, function together during *C. elegans*  
1110 postembryonic mesodermal development. *Dev Biol*.  
1111 doi:10.1016/j.ydbio.2009.07.034
- 1112 Kamath RS, Fraser AG, Dong Y, Poulin G, Durbin R, Gotta M, Kanapin A, Le

- 1113 Bot N, Moreno S, Sohrmann M, Welchman DP, Zipperien P, Ahringer J.  
1114 2003. Systematic functional analysis of the *Caenorhabditis elegans*  
1115 genome using RNAi. *Nature*. doi:10.1038/nature01278
- 1116 Kamath RS, Martinez-Campos M, Zipperlen P, Fraser AG, Ahringer J. 2001.  
1117 Effectiveness of specific RNA-mediated interference through ingested  
1118 double-stranded RNA in *Caenorhabditis elegans*. *Genome Biol*.  
1119 doi:10.1186/gb-2000-2-1-research0002
- 1120 Kheradpour P, Ernst J, Melnikov A, Rogov P, Wang L, Zhang X, Alston J,  
1121 Mikkelsen TS, Kellis M. 2013. Systematic dissection of regulatory motifs in  
1122 2000 predicted human enhancers using a massively parallel reporter  
1123 assay. *Genome Res* **23**:800–811. doi:10.1101/gr.144899.112
- 1124 Kim DS, Matsuda T, Cepko CL. 2008. A core paired-type and POU  
1125 homeodomain-containing transcription factor program drives retinal bipolar  
1126 cell gene expression. *J Neurosci*. doi:10.1523/JNEUROSCI.0397-08.2008
- 1127 Knoepfler PS, Calvo KR, Chen H, Antonarakis SE, Kamps MP. 1997. Meis1  
1128 and pKnox1 bind DNA cooperatively with Pbx1 utilizing an interaction  
1129 surface disrupted in oncoprotein E2a-Pbx1. *Proc Natl Acad Sci U S A*.  
1130 doi:10.1073/pnas.94.26.14553
- 1131 Kratsios P, Stolfi A, Levine M, Hobert O. 2012. Coordinated regulation of  
1132 cholinergic motor neuron traits through a conserved terminal selector gene.  
1133 *Nat Neurosci*. doi:10.1038/nn.2989
- 1134 Kuntz SG, Williams BA, Sternberg PW, Wold BJ. 2012. Transcription factor  
1135 redundancy and tissue-specific regulation: Evidence from functional and  
1136 physical network connectivity. *Genome Res* **22**:1907–1919.  
1137 doi:10.1101/gr.133306.111
- 1138 Layden MJ, Boekhout M, Martindale MQ. 2012. *Nematostella vectensis*  
1139 achaete-scute homolog NvashA regulates embryonic ectodermal  
1140 neurogenesis and represents an ancient component of the metazoan  
1141 neural specification pathway. *Development* **139**:1013–1022.  
1142 doi:10.1242/dev.073221
- 1143 Liachko NF, Saxton AD, McMillan PJ, Strovast TJ, Dirk Keene C, Bird TD,  
1144 Kraemer BC. 2019. Genome wide analysis reveals heparan sulfate  
1145 epimerase modulates TDP-43 proteinopathy. *PLoS Genet*.  
1146 doi:10.1371/journal.pgen.1008526
- 1147 Liu A, Niswander LA. 2005. Bone morphogenetic protein signalling and  
1148 vertebrate nervous system development. *Nat Rev Neurosci*.  
1149 doi:10.1038/nrn1805
- 1150 Liu H, Strauss TJ, Potts MB, Cameron S. 2006. Direct regulation of egl-1 of  
1151 programmed cell death by the Hox protein MAB-5 and CEH-20, a C.  
1152 *elegans* homolog of Pbx1. *Development*. doi:10.1242/dev.02234
- 1153 Liu Y, Yu C, Daley TP, Wang F, Cao WS, Bhate S, Lin X, Still C, Liu H, Zhao D,  
1154 Wang H, Xie XS, Ding S, Wong WH, Wernig M, Qi LS. 2018. CRISPR  
1155 Activation Screens Systematically Identify Factors that Drive Neuronal Fate  
1156 and Reprogramming. *Cell Stem Cell* **23**:758-771.e8.  
1157 doi:10.1016/j.stem.2018.09.003
- 1158 Lloret-Fernández C, Maicas M, Mora-Martínez C, Artacho A, Jimeno-Martín Á,  
1159 Chirivella L, Weinberg P, Flames N. 2018. A transcription factor collective  
1160 defines the HSN serotonergic neuron regulatory landscape. *Elife*.  
1161 doi:10.7554/eLife.32785
- 1162 Maeda R, Ishimura A, Mood K, Park EK, Buchberg AM, Daar IO. 2002. Xpbx1b

- 1163 and Xmeis1b play a collaborative role in hindbrain and neural crest gene  
1164 expression in *Xenopus* embryos. *Proc Natl Acad Sci U S A*.  
1165 doi:10.1073/pnas.082654899
- 1166 Maglich JM, Sluder A, Guan X, Shi Y, McKee DD, Carrick K, Kamdar K, Willson  
1167 TM, Moore JT. 2001. Comparison of complete nuclear receptor sets from  
1168 the human, *Caenorhabditis elegans* and *Drosophila* genomes. *Genome*  
1169 *Biol.* doi:10.1186/gb-2001-2-8-research0029
- 1170 Mall M, Karetka MS, Chanda S, Ahlenius H, Perotti N, Zhou B, Grieder SD, Ge  
1171 X, Drake S, Euong Ang C, Walker BM, Vierbuchen T, Fuentes DR,  
1172 Brennecke P, Nitta KR, Jolma A, Steinmetz LM, Taipale J, Südhof TC,  
1173 Wernig M. 2017. Myt1l safeguards neuronal identity by actively repressing  
1174 many non-neuronal fates. *Nature*. doi:10.1038/nature21722
- 1175 Masserdotti G, Gascón S, Götz M. 2016. Direct neuronal reprogramming:  
1176 Learning from and for development. *Dev.* doi:10.1242/dev.092163
- 1177 Mears AJ, Kondo M, Swain PK, Takada Y, Bush RA, Saunders TL, Sieving PA,  
1178 Swaroop A. 2001. Nrl is required for rod photoreceptor development. *Nat*  
1179 *Genet.* doi:10.1038/ng774
- 1180 Narasimhan K, Lambert SA, Yang AWH, Riddell J, Mnaimneh S, Zheng H, Albu  
1181 M, Najafabadi HS, Reece-Hoyes JS, Fuxman Bass JI, Walhout AJM,  
1182 Weirauch MT, Hughes TR. 2015. Mapping and analysis of *Caenorhabditis*  
1183 *elegans* transcription factor sequence specificities. *Elife*.  
1184 doi:10.7554/eLife.06967
- 1185 Noman A, Liu Z, Aqeel M, Zainab M, Khan MI, Hussain A, Ashraf MF, Li X,  
1186 Weng Y, He S. 2017. Basic leucine zipper domain transcription factors: the  
1187 vanguards in plant immunity. *Biotechnol Lett* **39**:1779–1791.  
1188 doi:10.1007/s10529-017-2431-1
- 1189 Nuez I, Félix MA. 2012. Evolution of susceptibility to ingested double-stranded  
1190 rnas in *Caenorhabditis* nematodes. *PLoS One*.  
1191 doi:10.1371/journal.pone.0029811
- 1192 Offenburger SL, Bensaddek D, Murillo AB, Lamond AI, Gartner A. 2017.  
1193 Comparative genetic, proteomic and phosphoproteomic analysis of *C.*  
1194 *elegans* embryos with a focus on ham-1/STOX and pig-1/MELK in  
1195 dopaminergic neuron development. *Sci Rep.* doi:10.1038/s41598-017-  
1196 04375-4
- 1197 Olsson-Carter K, Slack FJ. 2010. A developmental timing switch promotes axon  
1198 outgrowth independent of known guidance receptors. *PLoS Genet.*  
1199 doi:10.1371/journal.pgen.1001054
- 1200 Packer JS, Zhu Q, Huynh C, Sivaramakrishnan P, Preston E, Dueck H, Stefanik  
1201 D, Tan K, Trapnell C, Kim J, Waterston RH, Murray JI. 2019. A lineage-  
1202 resolved molecular atlas of *C. elegans* embryogenesis at single-cell  
1203 resolution. *Science (80- )* **365**. doi:10.1126/science.aax1971
- 1204 Poole RJ, Bashllari E, Cochella L, Flowers EB, Hobert O. 2011. A Genome-  
1205 Wide RNAi screen for factors involved in neuronal specification in  
1206 *Caenorhabditis elegans*. *PLoS Genet.* doi:10.1371/journal.pgen.1002109
- 1207 Portman DS, Emmons SW. 2000. The basic helix-loop-helix transcription  
1208 factors LIN-32 and HLH-2 function together in multiple steps of a *C.*  
1209 *elegans* neuronal sublineage. *Development*.
- 1210 Potts MB, Wang DP, Cameron S. 2009. Trithorax, Hox, and TALE-class  
1211 homeodomain proteins ensure cell survival through repression of the BH3-  
1212 only gene *egl-1*. *Dev Biol.* doi:10.1016/j.ydbio.2009.02.022

- 1213 Qiu M, Bulfone A, Martinez S, Meneses JJ, Shimamura K, Pedersen RA,  
1214 Rubenstein JLR. 1995. Null mutation of Dlx-2 results in abnormal  
1215 morphogenesis of proximal first and second branchial arch derivatives and  
1216 abnormal differentiation in the forebrain. *Genes Dev.*  
1217 doi:10.1101/gad.9.20.2523
- 1218 Qiu X, Hill A, Packer J, Lin D, Ma YA, Trapnell C. 2017a. Single-cell mRNA  
1219 quantification and differential analysis with Census. *Nat Methods.*  
1220 doi:10.1038/nmeth.4150
- 1221 Qiu X, Mao Q, Tang Y, Wang L, Chawla R, Pliner HA, Trapnell C. 2017b.  
1222 Reversed graph embedding resolves complex single-cell trajectories. *Nat*  
1223 *Methods.* doi:10.1038/nmeth.4402
- 1224 Reece-Hoyes JS, Deplancke B, Shingles J, Grove CA, Hope IA, Walhout AJM.  
1225 2005. A compendium of *Caenorhabditis elegans* regulatory transcription  
1226 factors: A resource for mapping transcription regulatory networks. *Genome*  
1227 *Biol* **6**. doi:10.1186/gb-2005-6-13-r110
- 1228 Remesal L, Roger-Banyat I, Chirivella L, Maicas M, Brocal-Ruiz R, Pérez-  
1229 Villalva A, Cucarella C, Casado M, Flames N. n.d. PBX1 is a terminal  
1230 selector of olfactory bulb dopaminergic neurons. *Dev.*
- 1231 Remesal L, Roger-Baynat I, Chirivella L, Maicas M, Brocal-Ruiz R, Pérez-  
1232 Villalva A, Cucarella C, Casado M, Flames N. 2020. PBX1 acts as terminal  
1233 selector for olfactory bulb dopaminergic neurons. *Development*  
1234 dev.186841. doi:10.1242/dev.186841
- 1235 Rentzsch F, Layden M, Manuel M. 2017. The cellular and molecular basis of  
1236 cnidarian neurogenesis. *Wiley Interdiscip Rev Dev Biol* **6**:1–19.  
1237 doi:10.1002/wdev.257
- 1238 Rieckhof GE, Casares F, Ryoo HD, Abu-Shaar M, Mann RS. 1997. Nuclear  
1239 translocation of extradenticle requires homothorax, which encodes an  
1240 extradenticle-related homeodomain protein. *Cell.* doi:10.1016/S0092-  
1241 8674(00)80400-6
- 1242 Roy K, Kuznicki K, Wu Q, Sun Z, Bock D, Schutz G, Vranich N, Monaghan AP.  
1243 2004. The *tlx* gene regulates the timing of neurogenesis in the cortex. *J*  
1244 *Neurosci.* doi:10.1523/JNEUROSCI.1148-04.2004
- 1245 Rual JF, Ceron J, Koreth J, Hao T, Nicot AS, Hirozane-Kishikawa T,  
1246 Vandenhoute J, Orkin SH, Hill DE, van den Heuvel S, Vidal M. 2004.  
1247 Toward improving *Caenorhabditis elegans* phenome mapping with an  
1248 ORFeome-based RNAi library. *Genome Res.* doi:10.1101/gr.2505604
- 1249 Sengupta P, Colbert HA, Bargmann CI. 1994. The *C. elegans* gene *odr-7*  
1250 encodes an olfactory-specific member of the nuclear receptor superfamily.  
1251 *Cell.* doi:10.1016/0092-8674(94)90028-0
- 1252 Serobyan V, Kontarakis Z, El-Brolosy MA, Welker JM, Tolstenkov O,  
1253 Saadeldein AM, Retzer N, Gottschalk A, Wehman AM, Stainier DYR. 2020.  
1254 Transcriptional adaptation in *caenorhabditis elegans*. *Elife.*  
1255 doi:10.7554/eLife.50014
- 1256 Serrano-Saiz E, Poole RJ, Felton T, Zhang F, De La Cruz ED, Hobert O. 2013.  
1257 XModular control of glutamatergic neuronal identity in *C. elegans* by  
1258 distinct homeodomain proteins. *Cell.* doi:10.1016/j.cell.2013.09.052
- 1259 Shan G, Walthall WW. 2008. Copulation in *C. elegans* males requires a nuclear  
1260 hormone receptor. *Dev Biol* **322**:11–20. doi:10.1016/j.ydbio.2008.06.034
- 1261 Shimizu Takeshi, Nakazawa M, Kani S, Bae YK, Shimizu Takashi, Kageyama  
1262 R, Hibi M. 2010. Zinc finger genes *Fezf1* and *Fezf2* control neuronal

- 1263 differentiation by repressing Hes5 expression in the forebrain.  
1264 *Development* **137**:1875–1885. doi:10.1242/dev.047167
- 1265 Shirasaki R, Pfaff SL. 2002. Transcriptional Codes and the Control of Neuronal  
1266 Identity. *Annu Rev Neurosci*.  
1267 doi:10.1146/annurev.neuro.25.112701.142916
- 1268 Shubin N, Tabin C, Carroll S. 2009. Deep homology and the origins of  
1269 evolutionary novelty. *Nature*. doi:10.1038/nature07891
- 1270 Sieburth D, Ch'ng Q, Dybbs M, Tavazoie M, Kennedy S, Wang D, Dupuy D,  
1271 Rual JF, Hill DE, Vidal M, Ruvkun G, Kaplan JM. 2005. Systematic analysis  
1272 of genes required for synapse structure and function. *Nature* **436**:510–516.  
1273 doi:10.1038/nature03809
- 1274 Simmer F, Moorman C, Van Der Linden AM, Kuijk E, Van Den Berghe PVE,  
1275 Kamath RS, Fraser AG, Ahringer J, Plasterk RHA. 2003. Genome-wide  
1276 RNAi of *C. elegans* using the hypersensitive rrf-3 strain reveals novel gene  
1277 functions. *PLoS Biol*. doi:10.1371/journal.pbio.0000012
- 1278 Singhvi A, Frank CA, Garriga G. 2008. The T-box gene *tbx-2*, the homeobox  
1279 gene *egl-5* and the asymmetric cell division gene *ham-1* specify neural fate  
1280 in the HSN/PHB lineage. *Genetics* **179**:887–898.  
1281 doi:10.1534/genetics.108.088948
- 1282 Spitz F, Furlong EEM. 2012. Transcription factors: From enhancer binding to  
1283 developmental control. *Nat Rev Genet*. doi:10.1038/nrg3207
- 1284 Stefanakis N, Carrera I, Hobert O. 2015. Regulatory Logic of Pan-Neuronal  
1285 Gene Expression in *C. elegans*. *Neuron*. doi:10.1016/j.neuron.2015.07.031
- 1286 Stegmaier P, Kel AE, Wingender E. 2004. Systematic DNA-binding domain  
1287 classification of transcription factors. *Genome Inform*.  
1288 doi:10.11234/gi1990.15.2\_276
- 1289 Swoboda P, Adler HT, Thomas JH. 2000. The RFX-type transcription factor  
1290 DAF-19 regulates sensory neuron cilium formation in *C. Elegans*. *Mol Cell*.  
1291 doi:10.1016/S1097-2765(00)80436-0
- 1292 Sze JY, Zhang S, Li J, Ruvkun G. 2002. The *C. elegans* POU-domain  
1293 transcription factor UNC-86 regulates the *tph-1* tryptophan hydroxylase  
1294 gene and neurite outgrowth in specific serotonergic neurons. *Development*.  
1295 Taubert S, Ward JD, Yamamoto KR. 2011. Nuclear hormone receptors in  
1296 nematodes: Evolution and function. *Mol Cell Endocrinol*.  
1297 doi:10.1016/j.mce.2010.04.021
- 1298 Tewhey R, Kotliar D, Park DS, Liu B, Winnicki S, Reilly SK, Andersen KG,  
1299 Mikkelsen TS, Lander ES, Schaffner SF, Sabeti PC. 2016. Direct  
1300 identification of hundreds of expression-modulating variants using a  
1301 multiplexed reporter assay. *Cell* **165**:1519–1529.  
1302 doi:10.1016/j.cell.2016.04.027
- 1303 Thor S, Andersson SGE, Tomlinson A, Thomas JB. 1999. A LIM-homeodomain  
1304 combinatorial code for motor- neuron pathway selection system , although  
1305 expression was also observed in precursors of the. *Nature* **397**:76–80.
- 1306 Toshiaki A. 2019. Brunnermunzel: (Permuted) Brunner-Munzel Test. *R Packag*  
1307 *version 135* <https://CRANR-project.org/package=brunnermunzel>.
- 1308 Tournière O, Dolan D, Richards GS, Sunagar K, Columbus-Shenkar YY, Moran  
1309 Y, Rentzsch F. 2020. NvPOU4/Brain3 Functions as a Terminal Selector  
1310 Gene in the Nervous System of the Cnidarian *Nematostella vectensis*. *Cell*  
1311 *Rep* **30**:4473-4489.e5. doi:10.1016/j.celrep.2020.03.031
- 1312 Trapnell C, Cacchiarelli D, Grimsby J, Pokharel P, Li S, Morse M, Lennon NJ,

- 1313 Livak KJ, Mikkelsen TS, Rinn JL. 2014. The dynamics and regulators of cell  
1314 fate decisions are revealed by pseudotemporal ordering of single cells. *Nat*  
1315 *Biotechnol.* doi:10.1038/nbt.2859
- 1316 Van Auken K, Weaver D, Robertson B, Sundaram M, Saldi T, Edgar L, Elling U,  
1317 Lee M, Boese Q, Wood WB. 2002. Roles of the homothorax/Meis/Prep  
1318 homolog UNC-62 and the Exd/Pbx homologs CEH-20 and CEH-40 in *C.*  
1319 *elegans* embryogenesis. *Development.*
- 1320 Vlachakis N, Choe SK, Sagerström CG. 2001. Meis3 synergizes with Pbx4 and  
1321 Hoxb1b in promoting hindbrain fates in the zebrafish. *Development.*
- 1322 Waclaw RR, Allen ZJ, Bell SM, Erdélyi F, Szabó G, Potter SS, Campbell K.  
1323 2006. The zinc finger transcription factor Sp8 regulates the generation and  
1324 diversity of olfactory bulb interneurons. *Neuron* **49**:503–516.  
1325 doi:10.1016/j.neuron.2006.01.018
- 1326 Walton T, Preston E, Nair G, Zacharias AL, Raj A, Murray JI. 2015. The Bicoid  
1327 Class Homeodomain Factors ceh-36/OTX and unc-30/PITX Cooperate in  
1328 *C. elegans* Embryonic Progenitor Cells to Regulate Robust Development.  
1329 *PLoS Genet* **11**:1–28. doi:10.1371/journal.pgen.1005003
- 1330 Weirauch MT, Yang A, Albu M, Cote AG, Montenegro-Montero A, Drewe P,  
1331 Najafabadi HS, Lambert SA, Mann I, Cook K, Zheng H, Goity A, van Bakel  
1332 H, Lozano JC, Galli M, Lewsey MG, Huang E, Mukherjee T, Chen X,  
1333 Reece-Hoyes JS, Govindarajan S, Shaulsky G, Walhout AJM, Bouget FY,  
1334 Ratsch G, Larrondo LF, Ecker JR, Hughes TR. 2014. Determination and  
1335 inference of eukaryotic transcription factor sequence specificity. *Cell.*  
1336 doi:10.1016/j.cell.2014.08.009
- 1337 Wende H, Lechner SG, Cheret C, Bourane S, Kolanczyk ME, Pattyn A, Reuter  
1338 K, Munier FL, Carroll P, Lewin GR, Birchmeier C. 2012. The transcription  
1339 factor c-Maf controls touch receptor development and function. *Science*  
1340 (80- ) **335**:1373–1376. doi:10.1126/science.1214314
- 1341 Zeng H, Sanes JR. 2017. Neuronal cell-type classification: Challenges,  
1342 opportunities and the path forward. *Nat Rev Neurosci.*  
1343 doi:10.1038/nrn.2017.85
- 1344 Zetterström RH, Solomin L, Jansson L, Hoffer BJ, Olson L, Perlmann T. 1997.  
1345 Dopamine neuron agenesis in Nurr1-deficient mice. *Science (80- )*.  
1346 doi:10.1126/science.276.5310.248
- 1347 Zhang F, Bhattacharya A, Nelson JC, Abe N, Gordon P, Lloret-Fernandez C,  
1348 Maicas M, Flames N, Mann RS, Colón-Ramos DA, Hobert O. 2014. The  
1349 LIM and POU homeobox genes ttx-3 and unc-86 act as terminal selectors  
1350 in distinct cholinergic and serotonergic neuron types. *Dev.*  
1351 doi:10.1242/dev.099721
- 1352 Zhang Z, et al. 2014. R: A language and environment for statistical computing.  
1353 R Foundation for Statistical Computing, Vienna, Austria. URL [http://www.R-](http://www.R-project.org/)  
1354 [project.org/](http://www.R-project.org/). *Nat Genet.* doi:10.1105/tpc.110.079111
- 1355 Zheng C, Karimzadegan S, Chiang V, Chalfie M. 2013. Histone Methylation  
1356 Restrains the Expression of Subtype-Specific Genes during Terminal  
1357 Neuronal Differentiation in *Caenorhabditis elegans*. *PLoS Genet.*  
1358 doi:10.1371/journal.pgen.1004017
- 1359 Zheng X, Chung S, Tanabe T, Sze JY. 2005. Cell-type specific regulation of  
1360 serotonergic identity by the *C. elegans* LIM-homeodomain factor LIM-4.  
1361 *Dev Biol.* doi:10.1016/j.ydbio.2005.08.013  
1362
